# Supplementary material
Source: PubMed Central journal article supplement (PMC3150502)
Supplement: NIHMS305169-supplement-supporting_information.pdf [file NIHMS305169-supplement-supporting_information.pdf]

## Supporting Information for:

### Translesion synthesis past the C8- and N<sup>2</sup>-deoxyguanosine adducts of the dietary mutagen 2-amino-3-methylimidazo[4,5-f]quinoline (IQ) in the *NarI* recognition sequence by bacterial DNA polymerases.

James S. Stover, Goutam Chowdhury, Hong Zang, F. Peter Guengerich and Carmelo J. Rizzo\*

*Departments of Chemistry and Biochemistry, Center in Molecular Toxicology, and Vanderbilt Institute of Chemical Biology, Vanderbilt University, Nashville, TN 37235-1822*

|                    |                                                                                                                      |    |
|--------------------|----------------------------------------------------------------------------------------------------------------------|----|
| <b>Figure S1.</b>  | CGE analysis of oligonucleotide <b>1b</b> .                                                                          | 3  |
| <b>Figure S2.</b>  | CGE analysis of oligonucleotide <b>1c</b> .                                                                          | 3  |
| <b>Figure S3.</b>  | CGE analysis of oligonucleotide <b>2a</b> .                                                                          | 4  |
| <b>Figure S4.</b>  | CGE analysis of oligonucleotide <b>2b</b> .                                                                          | 4  |
| <b>Figure S5.</b>  | MALDI-TOF spectrum of oligonucleotide <b>1b</b> .                                                                    | 5  |
| <b>Figure S6.</b>  | MALDI-TOF spectrum of oligonucleotide <b>1c</b> .                                                                    | 5  |
| <b>Figure S7.</b>  | MALDI-TOF spectrum of oligonucleotide <b>2b</b> .                                                                    | 6  |
| <b>Figure S8.</b>  | MALDI-TOF spectrum of oligonucleotide <b>2c</b> .                                                                    | 6  |
| <b>Figure S9.</b>  | Single nucleotide incorporation of oligonucleotides <b>1a-c</b> and <b>2a-c</b> by Kf <sup>-</sup> .                 | 7  |
| <b>Figure S10.</b> | Single nucleotide incorporation of oligonucleotides <b>1b</b> with a 0- and +1 primers.                              | 8  |
| <b>Figure S11.</b> | Single nucleotide incorporation of oligonucleotides <b>1a-c</b> and <b>2a-c</b> by pol II <sup>-</sup> .             | 9  |
| <b>Figure S12.</b> | LC-ESI-MS/MS analysis of the pol II <sup>-</sup> extension of oligonucleotide <b>1b</b> .                            | 10 |
| <b>Figure S13.</b> | TIC spectrum of the pol II <sup>-</sup> extension products from oligonucleotide <b>1b</b> .                          | 10 |
| <b>Figure S14.</b> | CID spectrum of the <i>m/z</i> 944.07 products from the pol II <sup>-</sup> extension of oligonucleotide <b>1b</b> . | 11 |
| <b>Table S1.</b>   | Observed and calculated CID fragmentation of 5'-pGGCCGAGTT-3' ( <i>m/z</i> 944.1).                                   | 11 |
| <b>Figure S15.</b> | TIC (top) and CID (bottom) spectra of an authentic sample of 5'pGGCCGAGTT-3' ( <i>m/z</i> 944.1).                    | 12 |
| <b>Figure S16.</b> | CID spectrum of the <i>m/z</i> 1053.7 products from the pol II <sup>-</sup> extension of oligonucleotide <b>1b</b> . | 13 |
| <b>Table S2.</b>   | Observed and calculated CID fragmentation of 5'-pGGGCCGAGTT-3' ( <i>m/z</i> 1053.7).                                 | 13 |
| <b>Figure S17.</b> | TIC (top) and CID (bottom) spectra of an authentic sample of 5'pGGGCCGAGTT-3' ( <i>m/z</i> 1053.7).                  | 14 |
| <b>Figure S18.</b> | LC-ESI-MS/MS analysis of the pol II <sup>-</sup> extension of oligonucleotide <b>2b</b> .                            | 15 |

|                    |                                                                                                                          |    |
|--------------------|--------------------------------------------------------------------------------------------------------------------------|----|
| <b>Figure S19.</b> | TIC spectrum of the pol II <sup>-</sup> extension products from oligonucleotide <b>2b</b> .....                          | 15 |
| <b>Figure S20.</b> | CID spectrum of the <i>m/z</i> 1152.8 products from the pol II <sup>-</sup> extension of oligonucleotide <b>2b</b> ..... | 16 |
| <b>Table S3.</b>   | Observed and calculated CID fragmentation of 5'-pGGCGCCGAGTA-3' ( <i>m/z</i> 1152.8).....                                | 16 |
| <b>Figure S21.</b> | TIC (top) and CID (bottom) spectra of an authentic sample of 5'-pGGCGCCGAGTA-3' ( <i>m/z</i> 1052).....                  | 17 |
| <b>Figure S22.</b> | TIC spectrum of the pol II <sup>-</sup> extension of oligonucleotide <b>2c</b> .....                                     | 18 |
| <b>Figure S23.</b> | CID spectrum of the <i>m/z</i> 1048.7 product from the pol II <sup>-</sup> extension of oligonucleotide <b>2c</b> .....  | 18 |
| <b>Table S4.</b>   | Observed and calculated CID fragmentation of 5'-pGGCGCCGAGT-3' ( <i>m/z</i> 1048.7).....                                 | 19 |
| <b>Figure S24.</b> | TIC (top) and CID (bottom) spectra of an authentic sample of 5'-pGGCGCCGAGT-3' ( <i>m/z</i> 1048.7).....                 | 20 |
| <b>Figure S25.</b> | Single nucleotide incorporation of oligonucleotides <b>1a-c</b> and <b>2a-c</b> by Dpo4.....                             | 21 |
| <b>Figure S26.</b> | LC-ESI-MS/MS analysis of the Dpo4 extension of oligonucleotide <b>1b</b> .....                                           | 22 |
| <b>Figure S26.</b> | TIC spectrum of the Dpo4 extension products from oligonucleotide <b>1b</b> .....                                         | 22 |
| <b>Figure S28.</b> | CID spectrum of the <i>m/z</i> 1043.4 product from the Dpo4 extension of oligonucleotide <b>1b</b> .....                 | 23 |
| <b>Table S5.</b>   | Observed and calculated CID fragmentation of 5'-pGGCCCGCGAG-3' ( <i>m/z</i> 1043.4).....                                 | 23 |
| <b>Figure S29.</b> | TIC (top) and CID (bottom) spectra of an authentic sample of 5'-pGGCCCGCGAG-3' ( <i>m/z</i> 1043.4).....                 | 24 |
| <b>Figure S30.</b> | LC-ESI-MS/MS analysis of the Dpo4 extension of oligonucleotide <b>2b</b> .....                                           | 25 |
| <b>Figure S31.</b> | TIC spectrum of the Dpo4 extension products from oligonucleotide <b>2b</b> .....                                         | 25 |
| <b>Figure S32.</b> | CID spectrum of the <i>m/z</i> 1048.5 products from the Dpo4 extension of oligonucleotide <b>2b</b> .....                | 26 |
| <b>Table S6.</b>   | Observed and calculated CID fragmentation of 5'-pGGCGCCGAGT-3' ( <i>m/z</i> 1048.5).....                                 | 26 |
| <b>Figure S33.</b> | LC-ESI-MS/MS analysis of the Dpo4 extension of oligonucleotide <b>1c</b> .....                                           | 27 |
| <b>Figure S34.</b> | TIC spectrum of the Dpo4 extension products from oligonucleotide <b>1c</b> .....                                         | 27 |
| <b>Figure S35.</b> | CID spectrum of the <i>m/z</i> 1153.1 products from the Dpo4 extension of oligonucleotide <b>1c</b> .....                | 28 |
| <b>Table S7.</b>   | Observed and calculated CID fragmentation of 5'-pGGCGCCGAGTA-3' ( <i>m/z</i> 1153.1).....                                | 28 |
| <b>Figure S36.</b> | LC-ESI-MS/MS analysis of the Dpo4 extension of oligonucleotide <b>2c</b> .....                                           | 29 |
| <b>Figure S37.</b> | TIC spectrum of the Dpo4 extension products from oligonucleotide <b>2c</b> .....                                         | 29 |
| <b>Figure S38.</b> | CID spectrum of the <i>m/z</i> xxxx products from the Dpo4 extension of oligonucleotide <b>2b</b> .....                  | 30 |
| <b>Table S8.</b>   | Observed and calculated CID fragmentation of 5'-pGGCGCCGAGT-3' ( <i>m/z</i> 1048.8).....                                 | 30 |

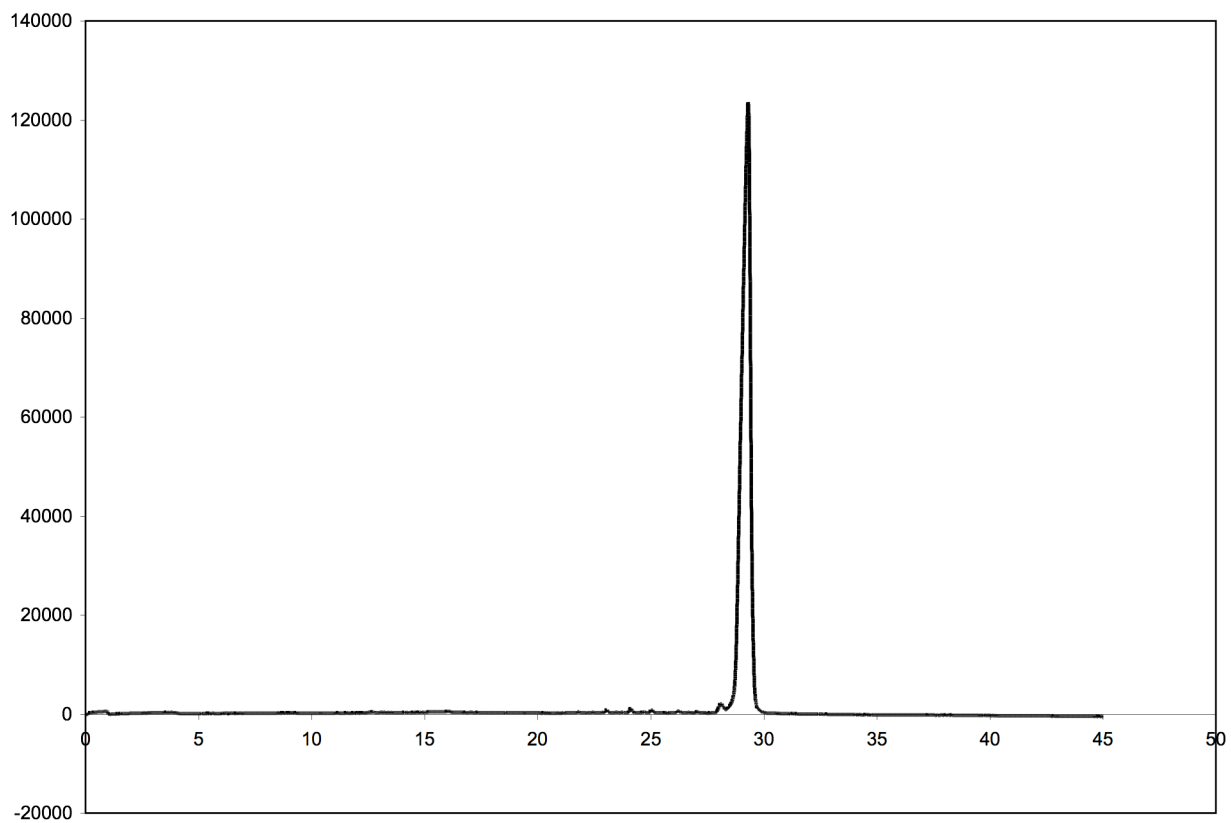

**Figure S1.** CGE analysis of oligonucleotide **1b**.

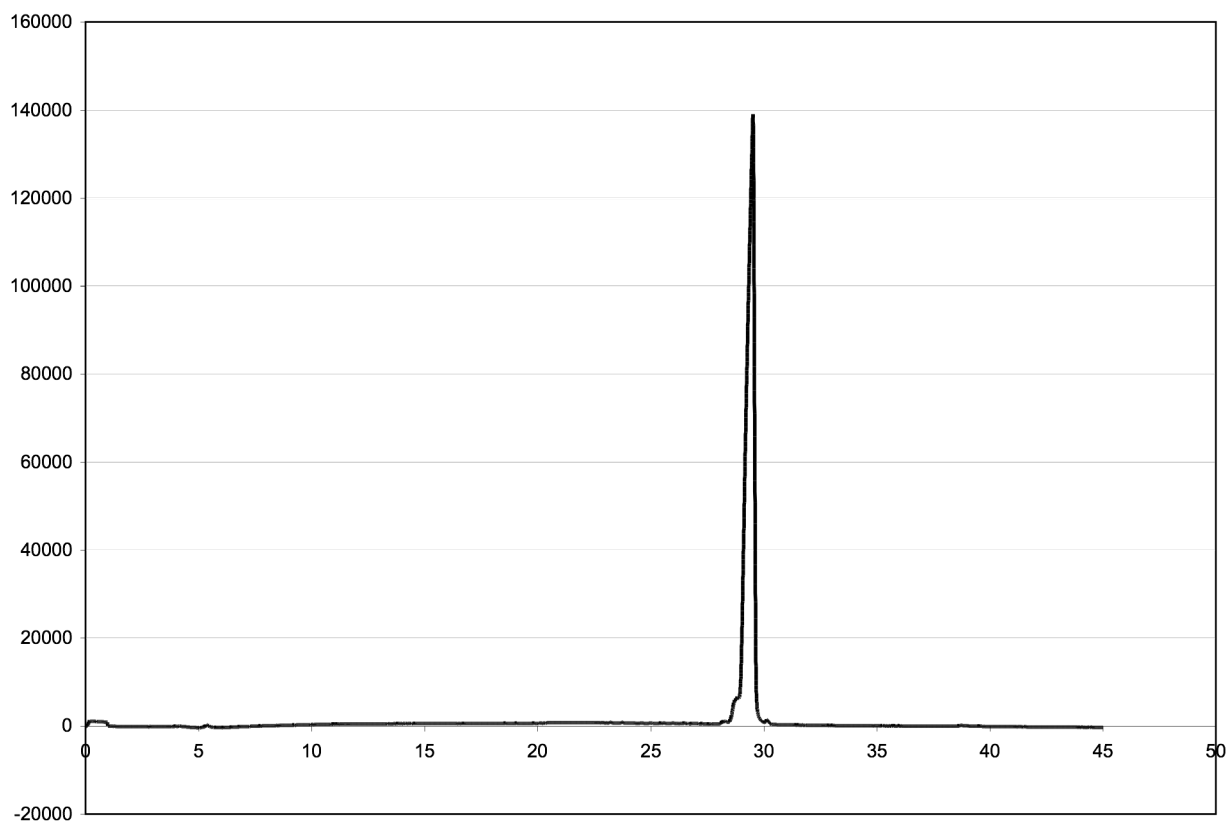

**Figure S2.** CGE analysis of oligonucleotide **1c**.

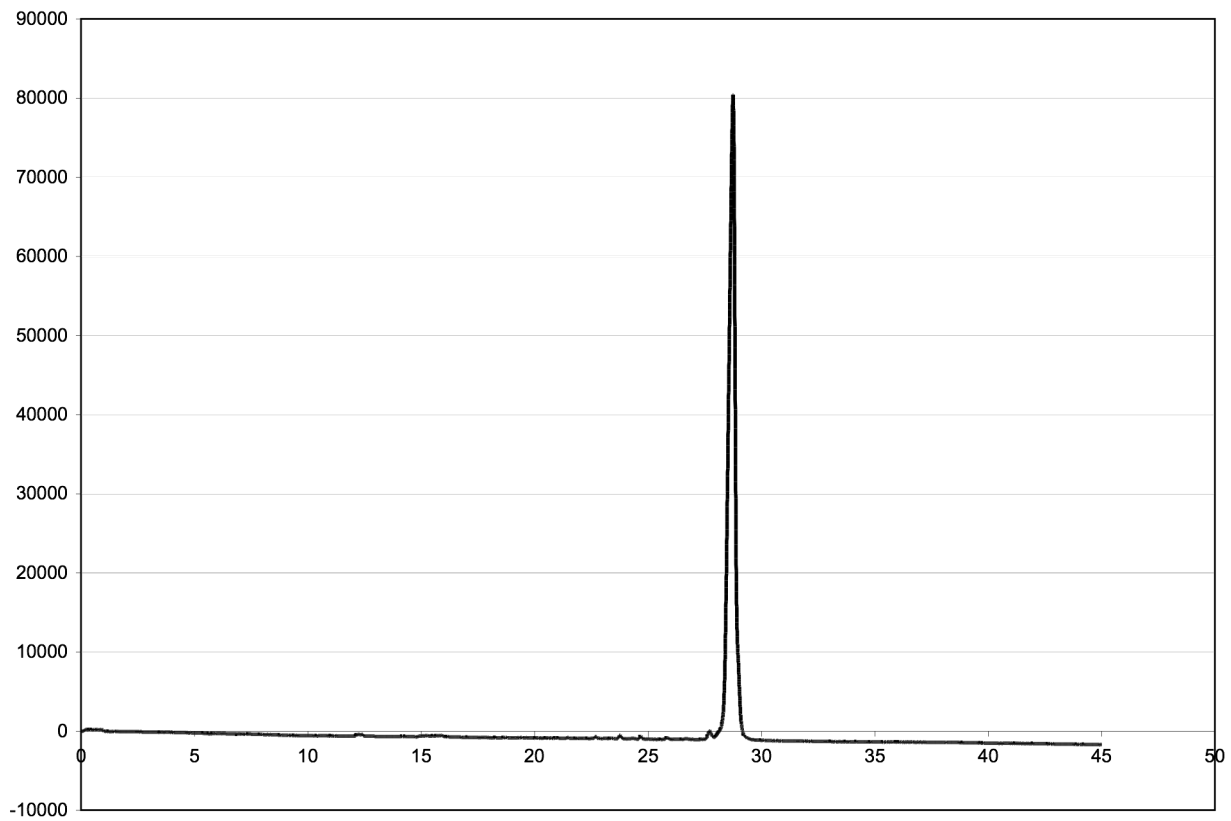

**Figure S3.** CGE analysis of oligonucleotide **2a**

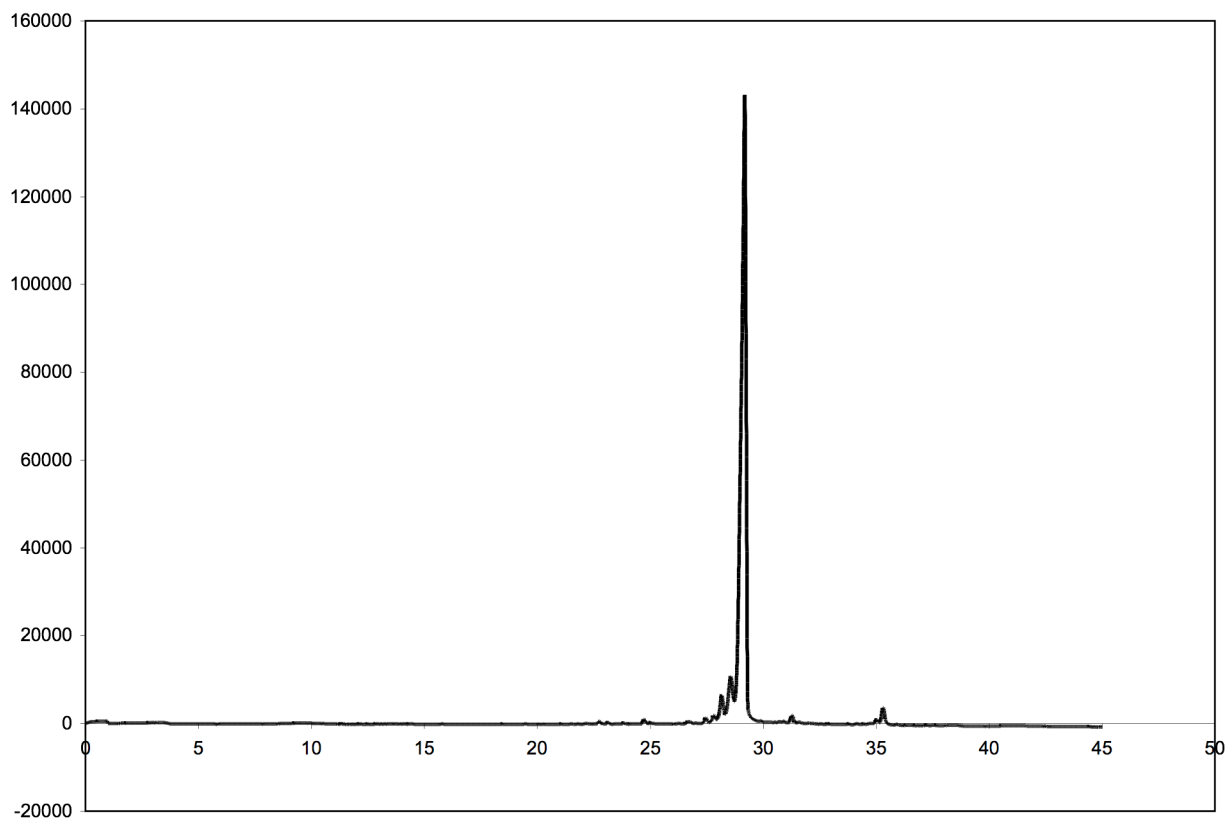

**Figure S4.** CGE analysis of oligonucleotide **2b**

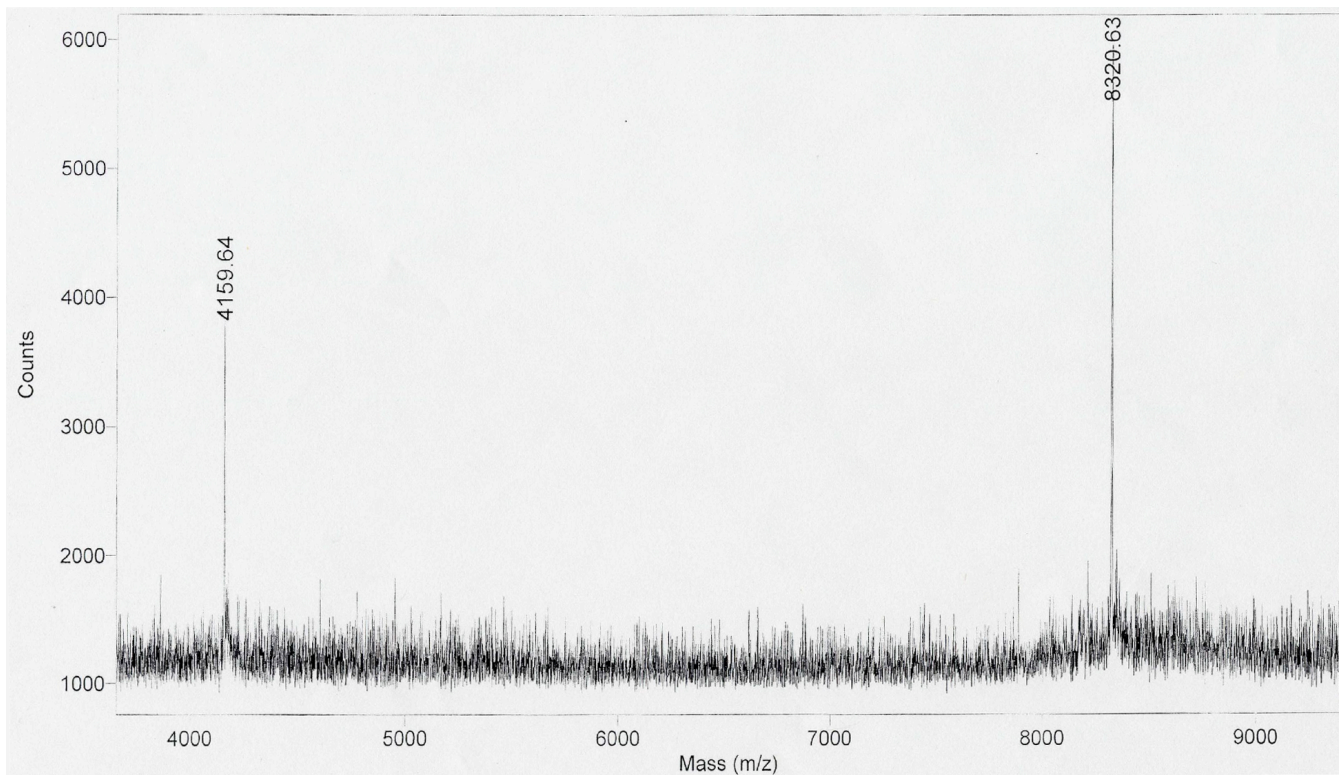

**Figure S5.** MALDI-TOF spectrum of oligonucleotide **1b**.

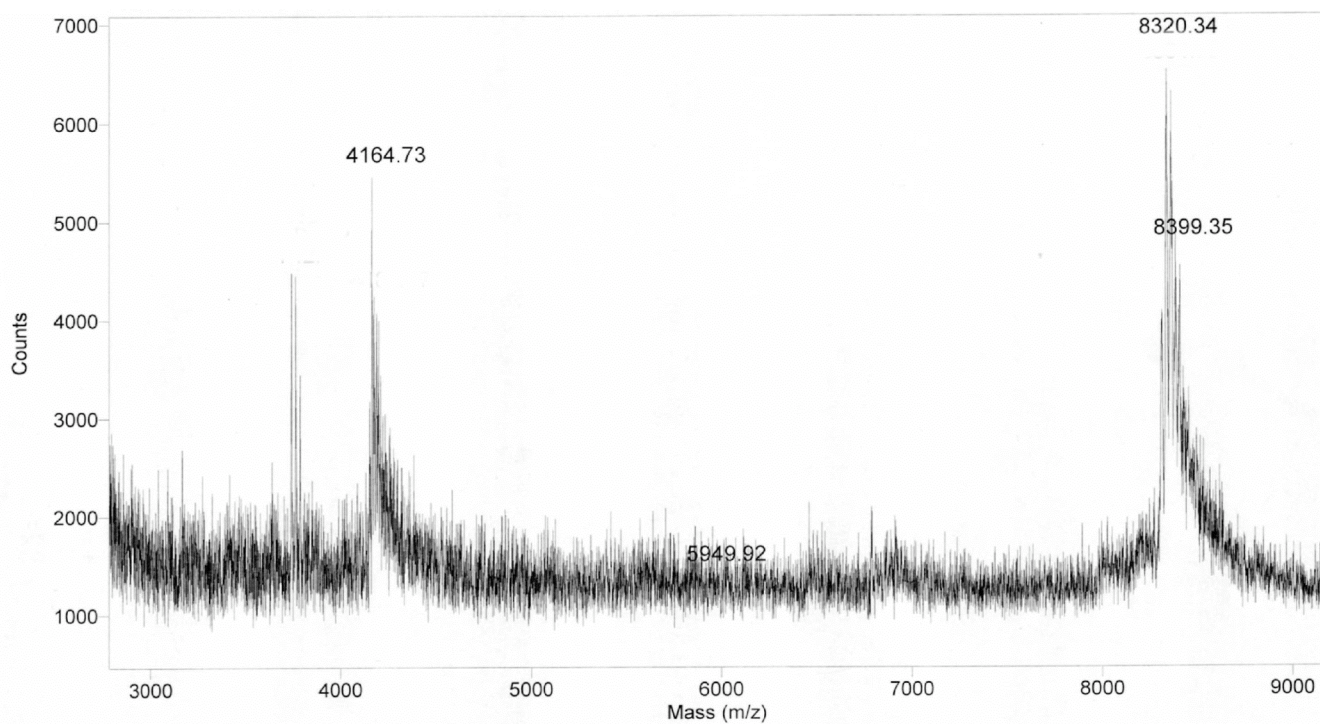

**Figure S6.** MALDI-TOF spectrum of oligonucleotide **1c**.

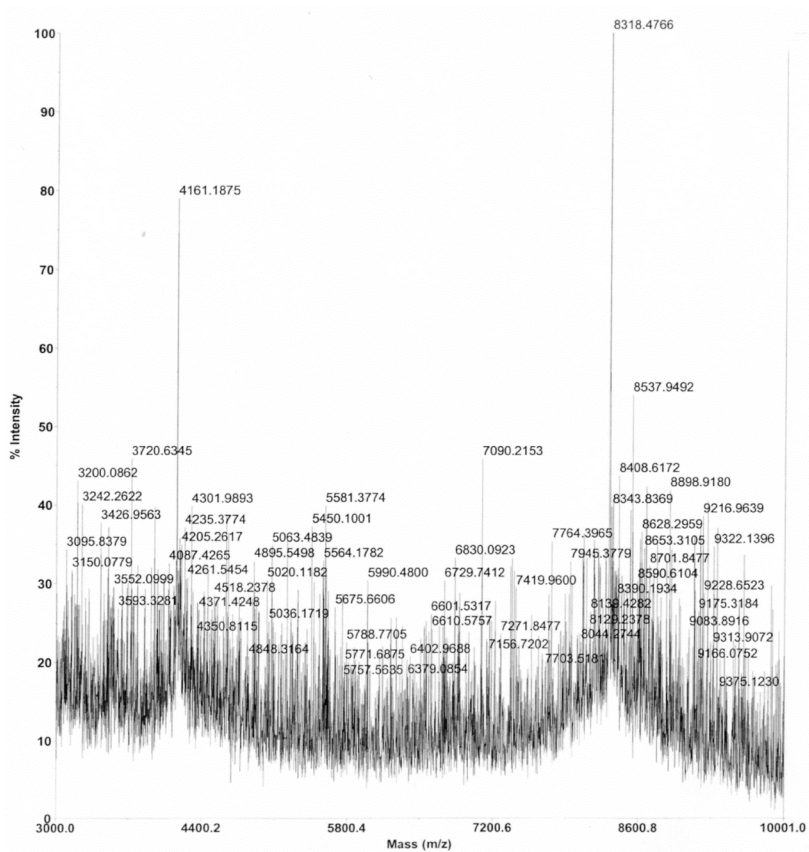

Figure S7. MALDI-TOF spectrum of oligonucleotide 2b.

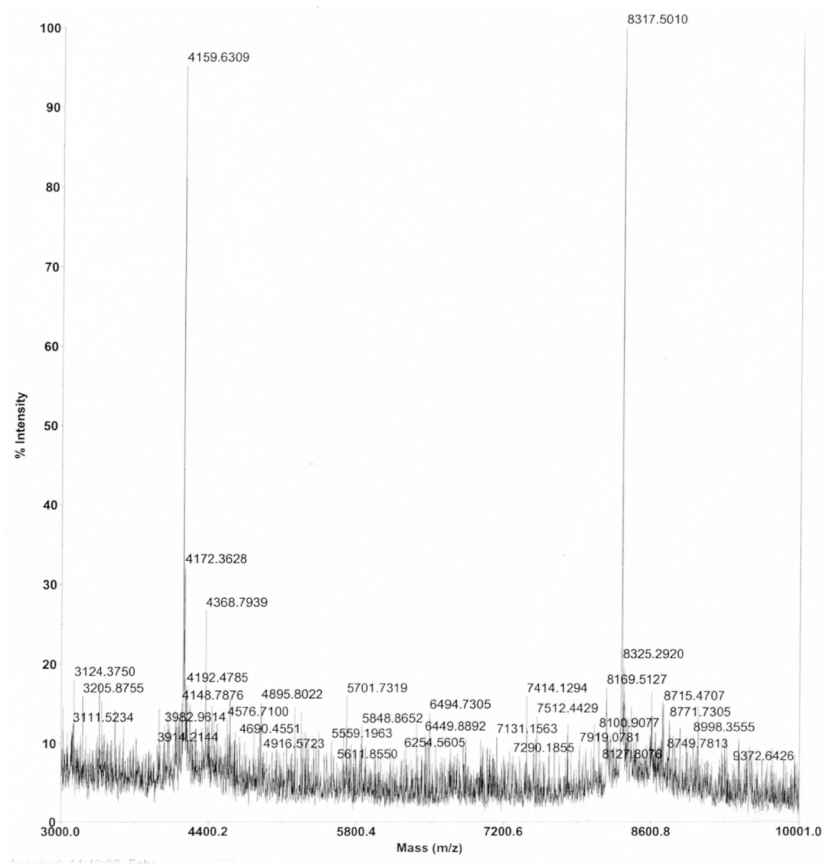

Figure S8. MALDI-TOF spectrum of oligonucleotide 2c.

3' -CCC CCG AGC ATT CCT AAC CX<sub>C</sub> GGC TCA-5' (1)  
 5' -<sup>32</sup>P-GGG GGC TCG TAA GGA TTG G

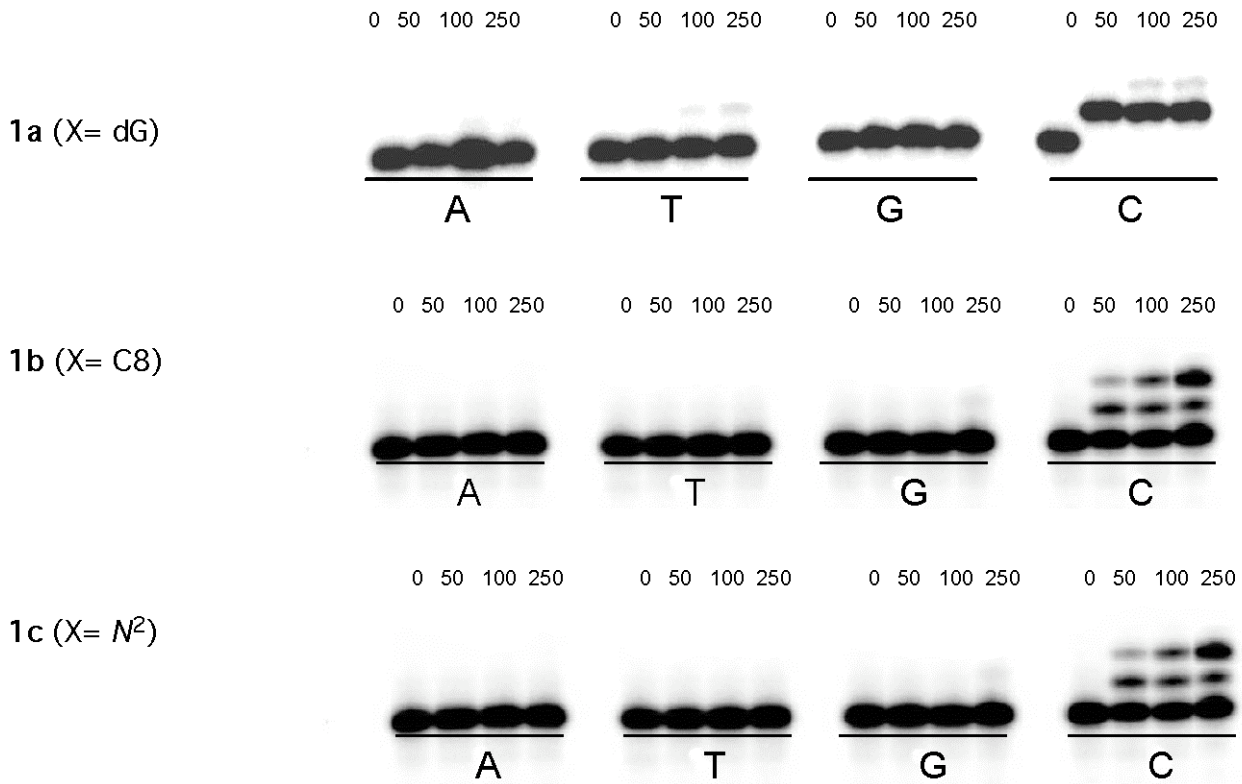

3' -CCC CCG AGC ATT CCT AAC CGC GX<sub>C</sub> TCA-5' (2)  
 5' -<sup>32</sup>P-GGG GGC TCG TAA GGA TTG GCG C

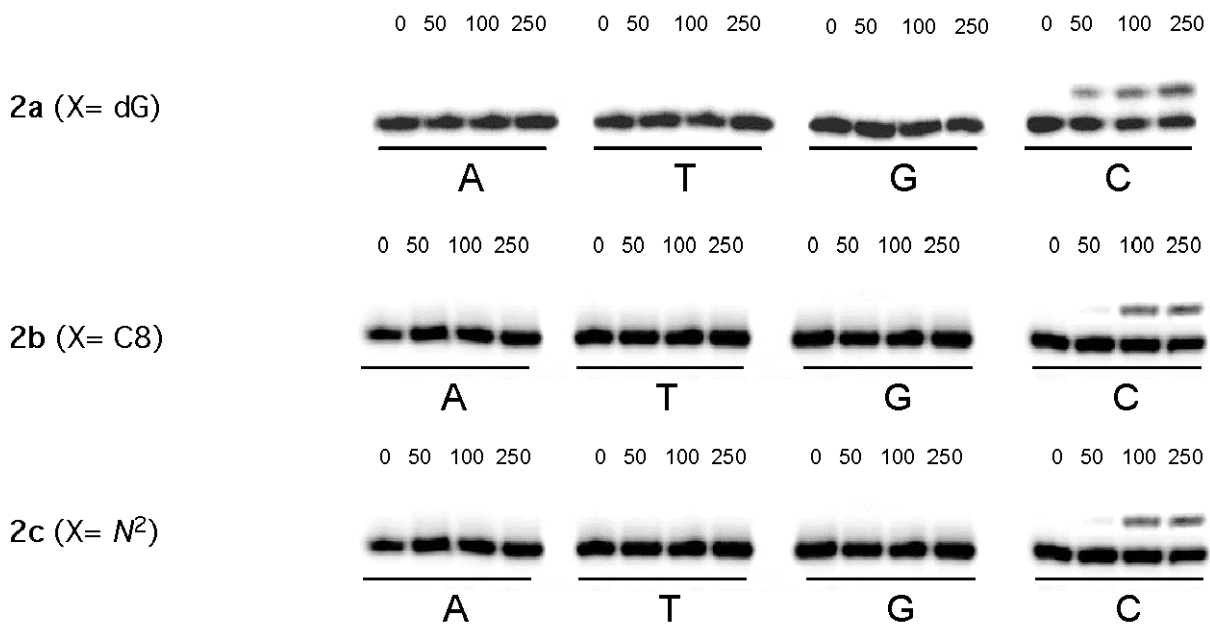

**Figure S9.** Single nucleotide incorporation of oligonucleotides **1a-c** and **2a-c** by Kf

3'-CCC CCG AGC ATT CCT AAC CXC GGC TCA-5' (**1b**)  
 5'-<sup>32</sup>P-GGG GGC TCG TAA GGA TTG G-- C

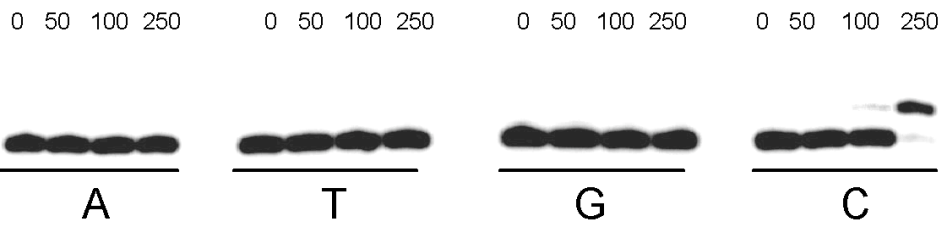

3'-CCC CCG AGC ATT CCT AAC CXC GGC TCA-5' (**1b**)  
 5'-<sup>32</sup>P-GGG GGC TCG TAA GGA TTG G-- CC

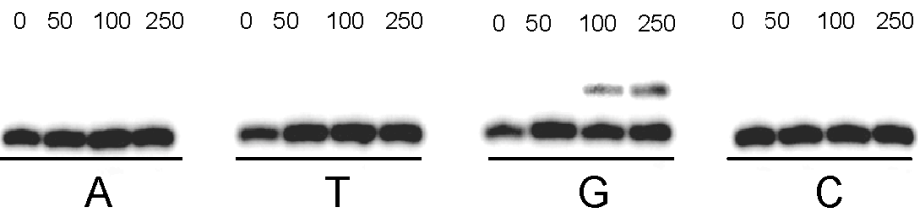

**Figure S10.** Single nucleotide incorporation of oligonucleotides **1b** with a 0- and +1 primers.



3'-CCC CCG AGC ATT CCT AAC CX<sub>C</sub> GGC TCA-5' (1)  
 5'-<sup>32</sup>P-GGG GGC TCG TAA GGA TTG G

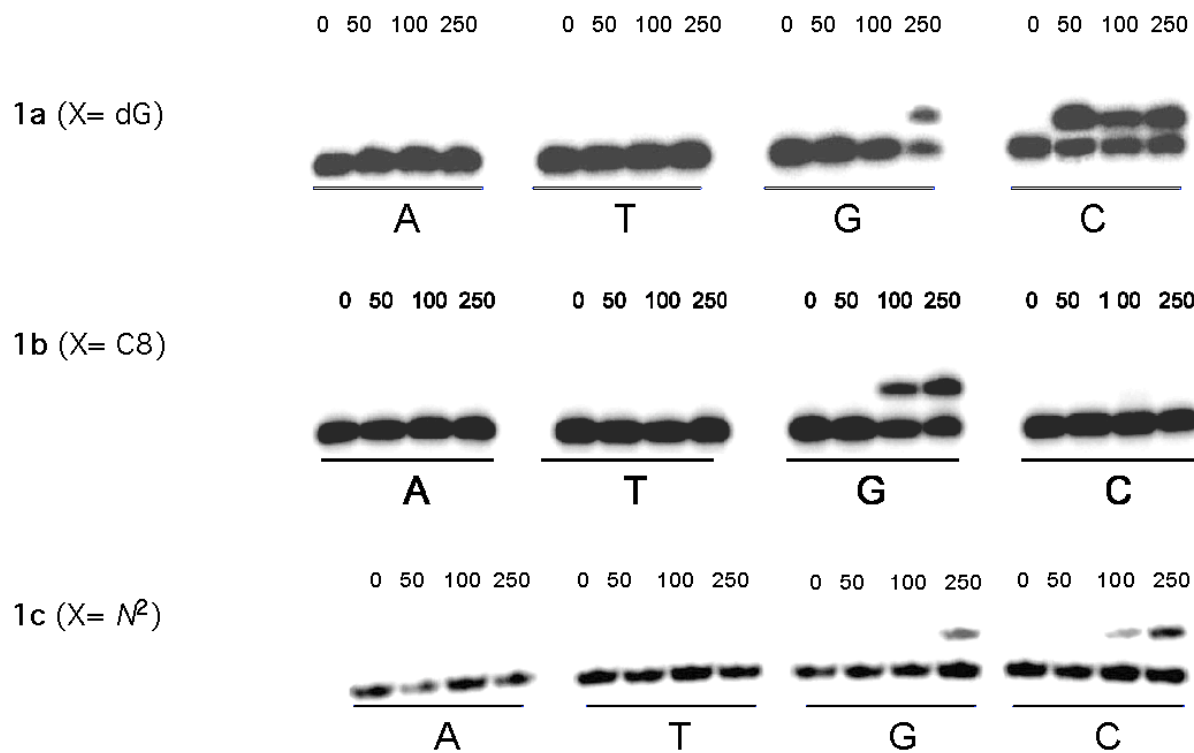

3'-CCC CCG AGC ATT CCT AAC CGC GX<sub>C</sub> TCA-5' (2)  
 5'-<sup>32</sup>P-GGG GGC TCG TAA GGA TTG GCG C

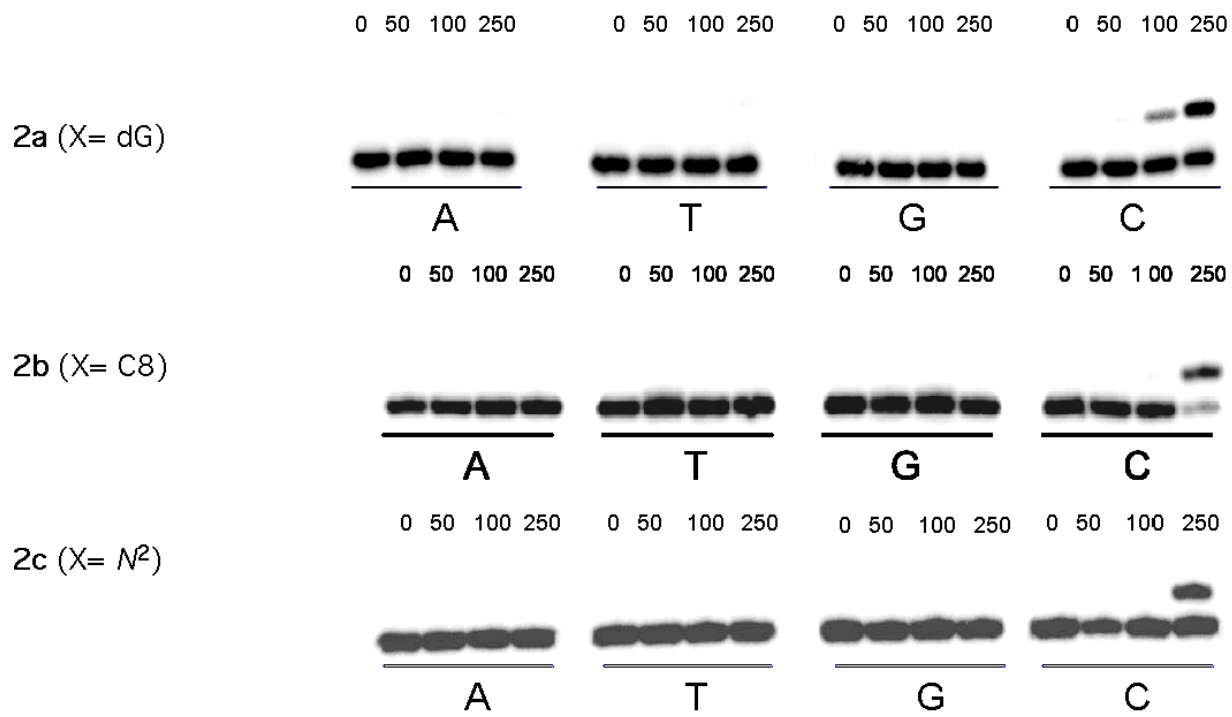

Figure S11. Single nucleotide incorporation of oligonucleotides **1a-c** and **2a-c** by pol II<sup>-</sup>

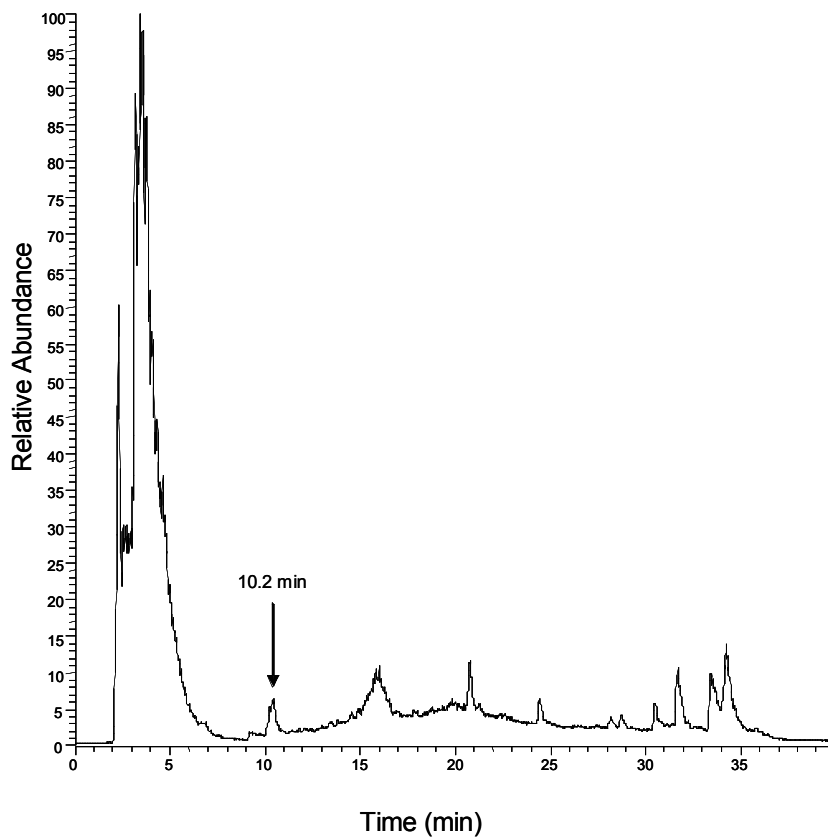

**Figure S12.** LC-ESI-MS/MS analysis of the pol II<sup>-</sup> extension of oligonucleotide **1b**.

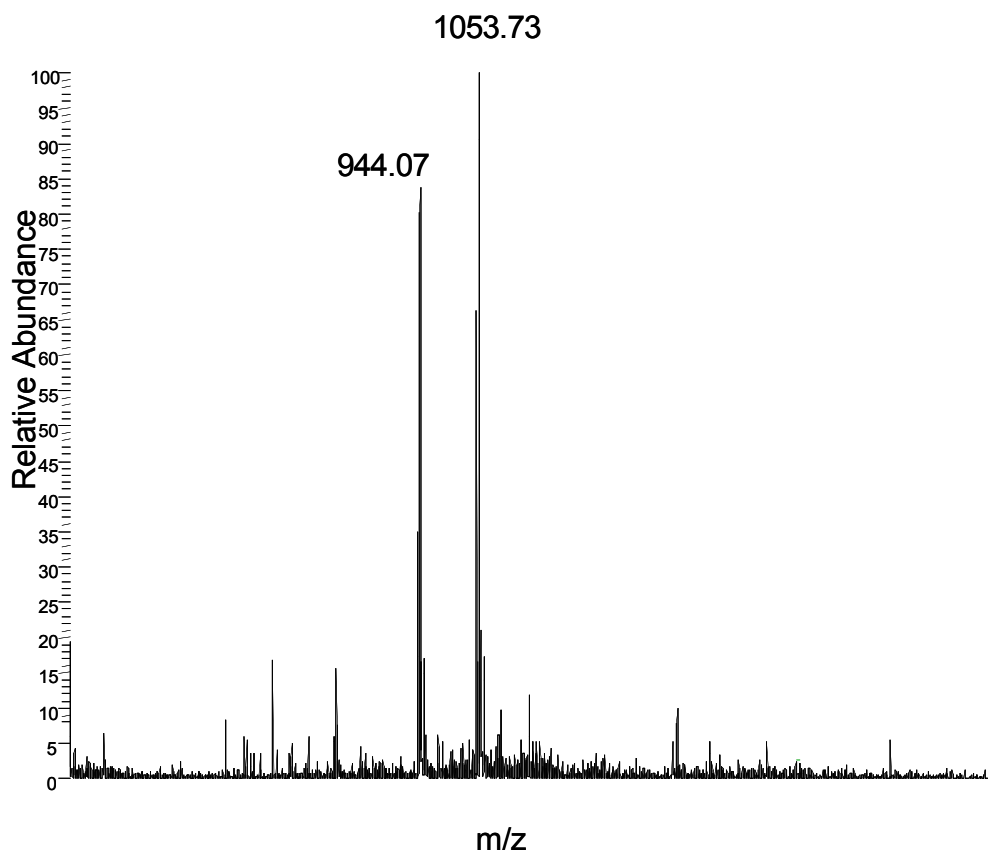

**Figure S13.** TIC spectrum of the pol II<sup>-</sup> extension products from oligonucleotide **1b**.

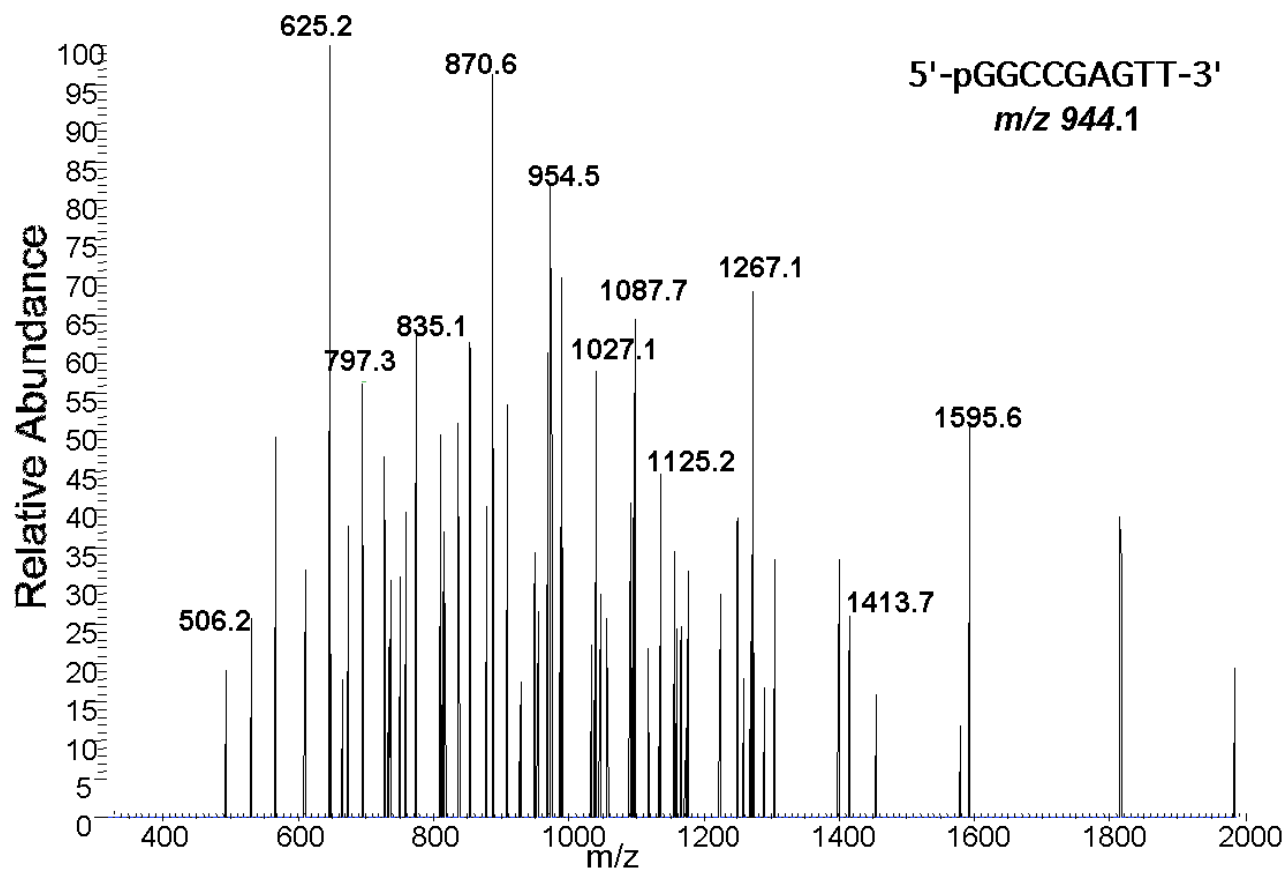

**Figure S14.** CID spectrum of the  $m/z$  944.07 products from the pol II<sup>-</sup> extension of oligonucleotide **1b**.

**Table S1.** Observed and calculated CID fragmentation of 5'-pGGCCGAGTT-3' ( $m/z$  944.1)

| Fragment assignment               | observed | theoretical |
|-----------------------------------|----------|-------------|
| 5'-pG (a <sub>2</sub> -B)         | 506.2    | 506.05      |
| 5'-pGG (a <sub>3</sub> -B)        | 835.1    | 835.10      |
| 5'-pGGC (a <sub>4</sub> -B)       | 1125.2   | 1124.14     |
| 5'-pGGCC (a <sub>5</sub> -B)      | 1413.7   | 1413.19     |
| 5'-pGGCCG (a <sub>6</sub> -B, -2) | 870.7    | 870.62      |
| 5-pGGCCGA (a <sub>7</sub> -B, -2) | 1027.1   | 1027.15     |
| pCCGAGT-3' (w <sub>7</sub> )      | 1087.7   | 1086.67     |
| pGAGTT-3' (w <sub>5</sub> )       | 1595.6   | 1596.26     |
| (w <sub>5</sub> , -2)             | 797.4    | 797.62      |
| pAGTT-3' (w <sub>4</sub> )        | 1267.1   | 1267.20     |
| pGTT-3' (w <sub>3</sub> )         | 954.5    | 654.15      |
| p-TT-3' (w <sub>2</sub> )         | 625.3    | 625.09      |

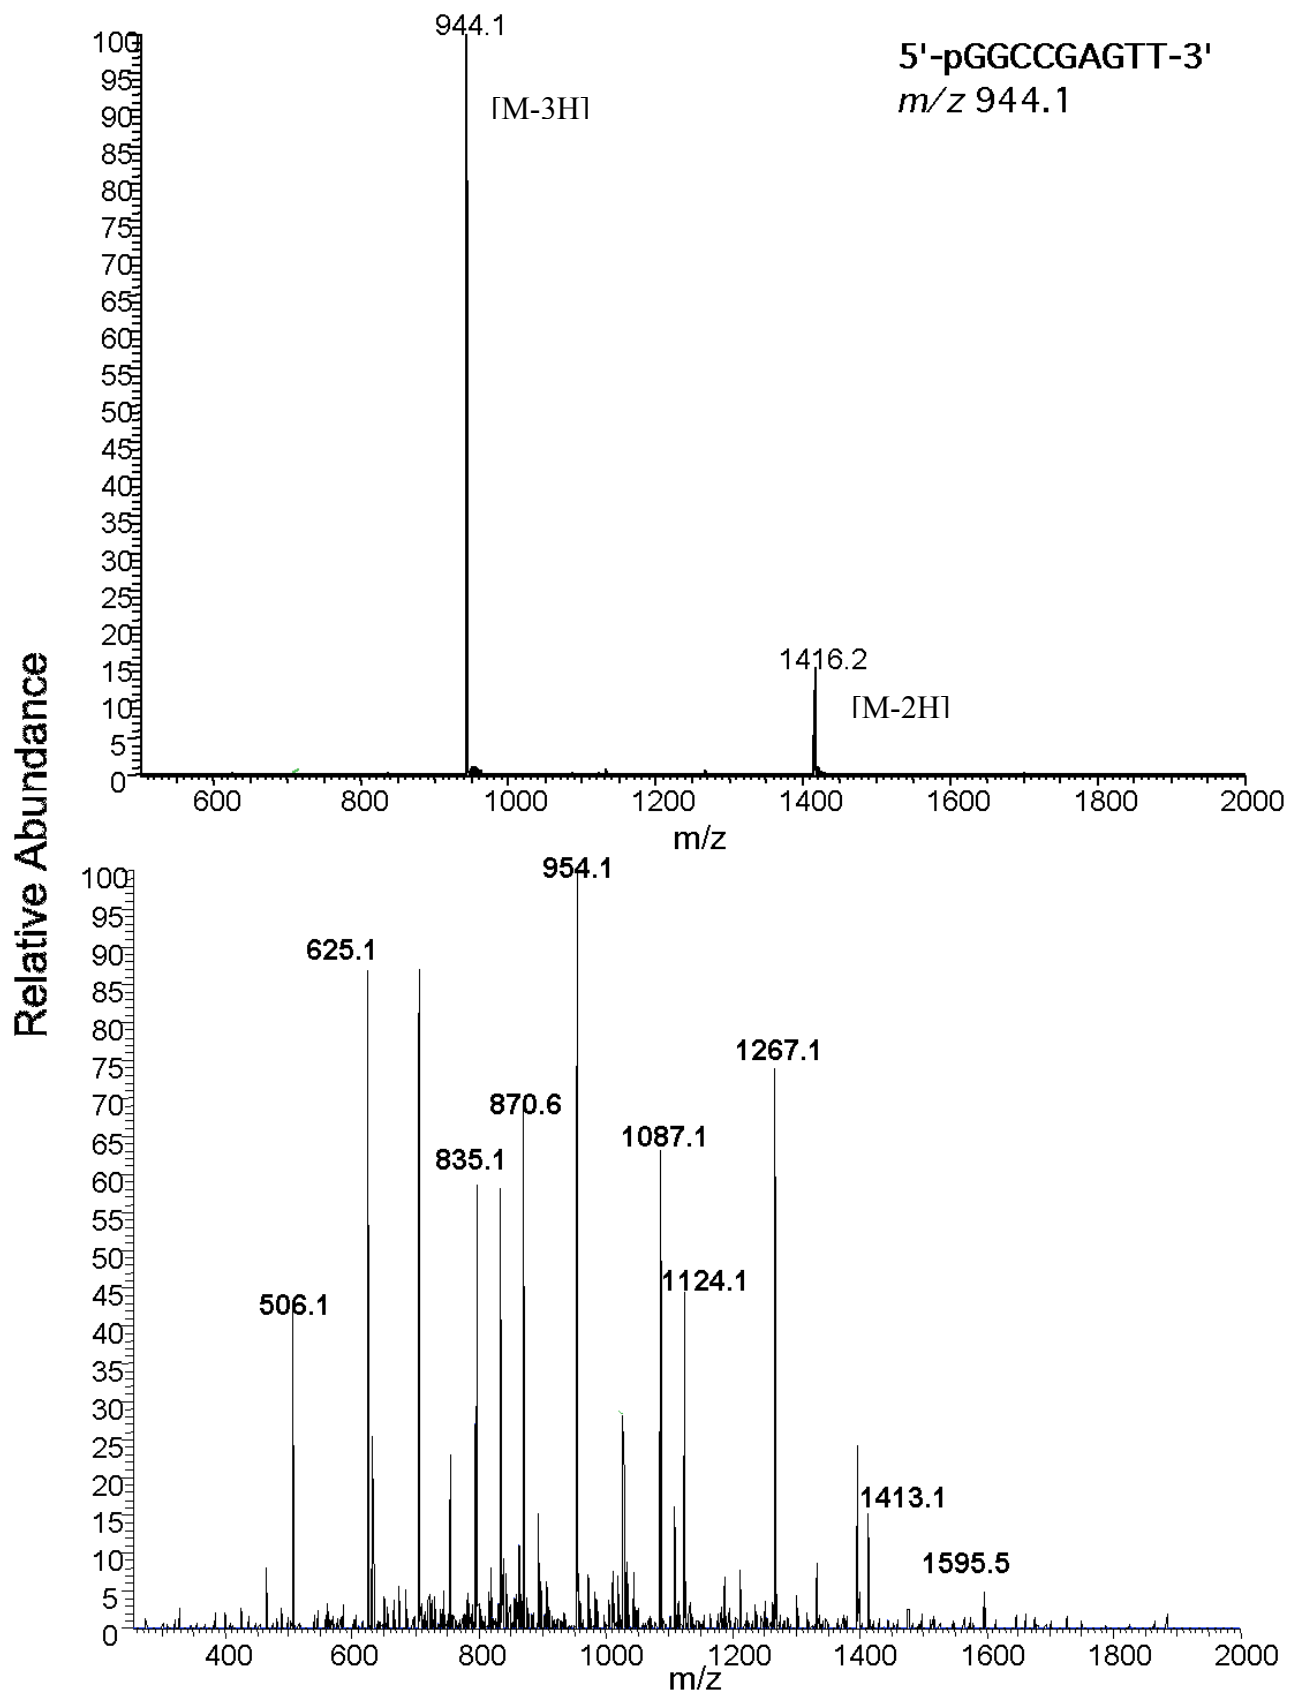

**Figure S15.** TIC (top) and CID (bottom) spectra of an authentic sample of 5'-pGGCCGAGTT-3' (*m/z* 944.1)

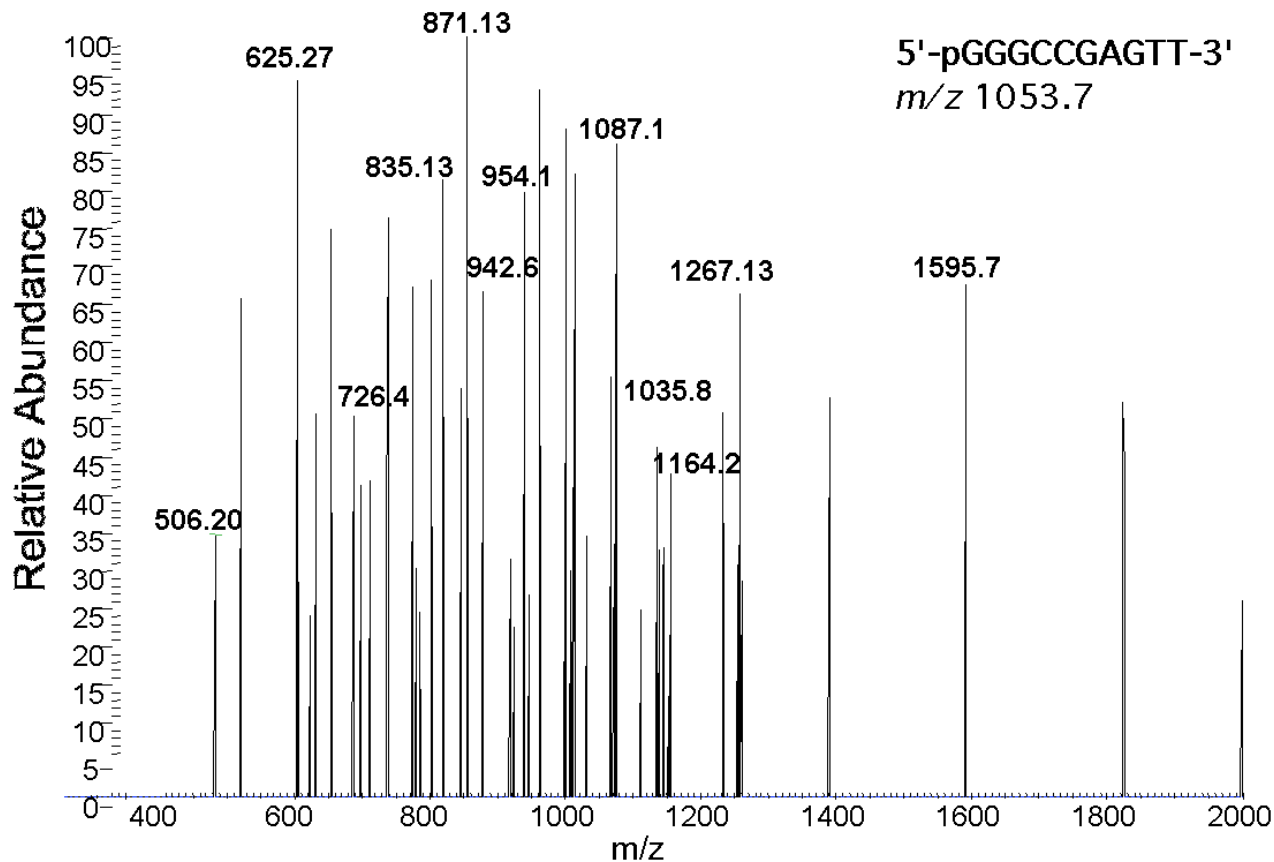

**Figure S16.** CID spectrum of the  $m/z$  1053.7 products from the pol II<sup>-</sup> extension of oligonucleotide **1b**.

**Table S2.** Observed and calculated CID fragmentation of 5'-pGGGCCGAGTT-3' ( $m/z$  1053.7)

| Fragment assignment               | observed | theoretical |
|-----------------------------------|----------|-------------|
| 5'-pG (a <sub>2</sub> -B)         | 506.2    | 506.05      |
| 5'-pGG (a <sub>3</sub> -B)        | 835.1    | 835.10      |
| 5'-pGGG (a <sub>4</sub> -B)       | 1164.2   | 1164.15     |
| 5'-pGGGC (a <sub>5</sub> -B, -2)  | 726.4    | 726.09      |
| 5'-pGGGCC (a <sub>6</sub> -B, -2) | 871.13   | 870.62      |
| 5-pGGGCCG (a <sub>7</sub> -B, -2) | 1035.8   | 1035.14     |
| pCCGAGTT-3' (w <sub>7</sub> , -2) | 1087.1   | 1086.67     |
| pCCGAGTT-3' (w <sub>6</sub> , -2) | 942.6    | 942.15      |
| pGAGTT-3' (w <sub>5</sub> )       | 1595.7   | 1596.26     |
| pAGTT-3' (w <sub>4</sub> )        | 1267.1   | 1267.20     |
| pGTT-3' (w <sub>3</sub> )         | 954.5    | 954.15      |
| p-TT-3' (w <sub>2</sub> )         | 625.3    | 625.09      |

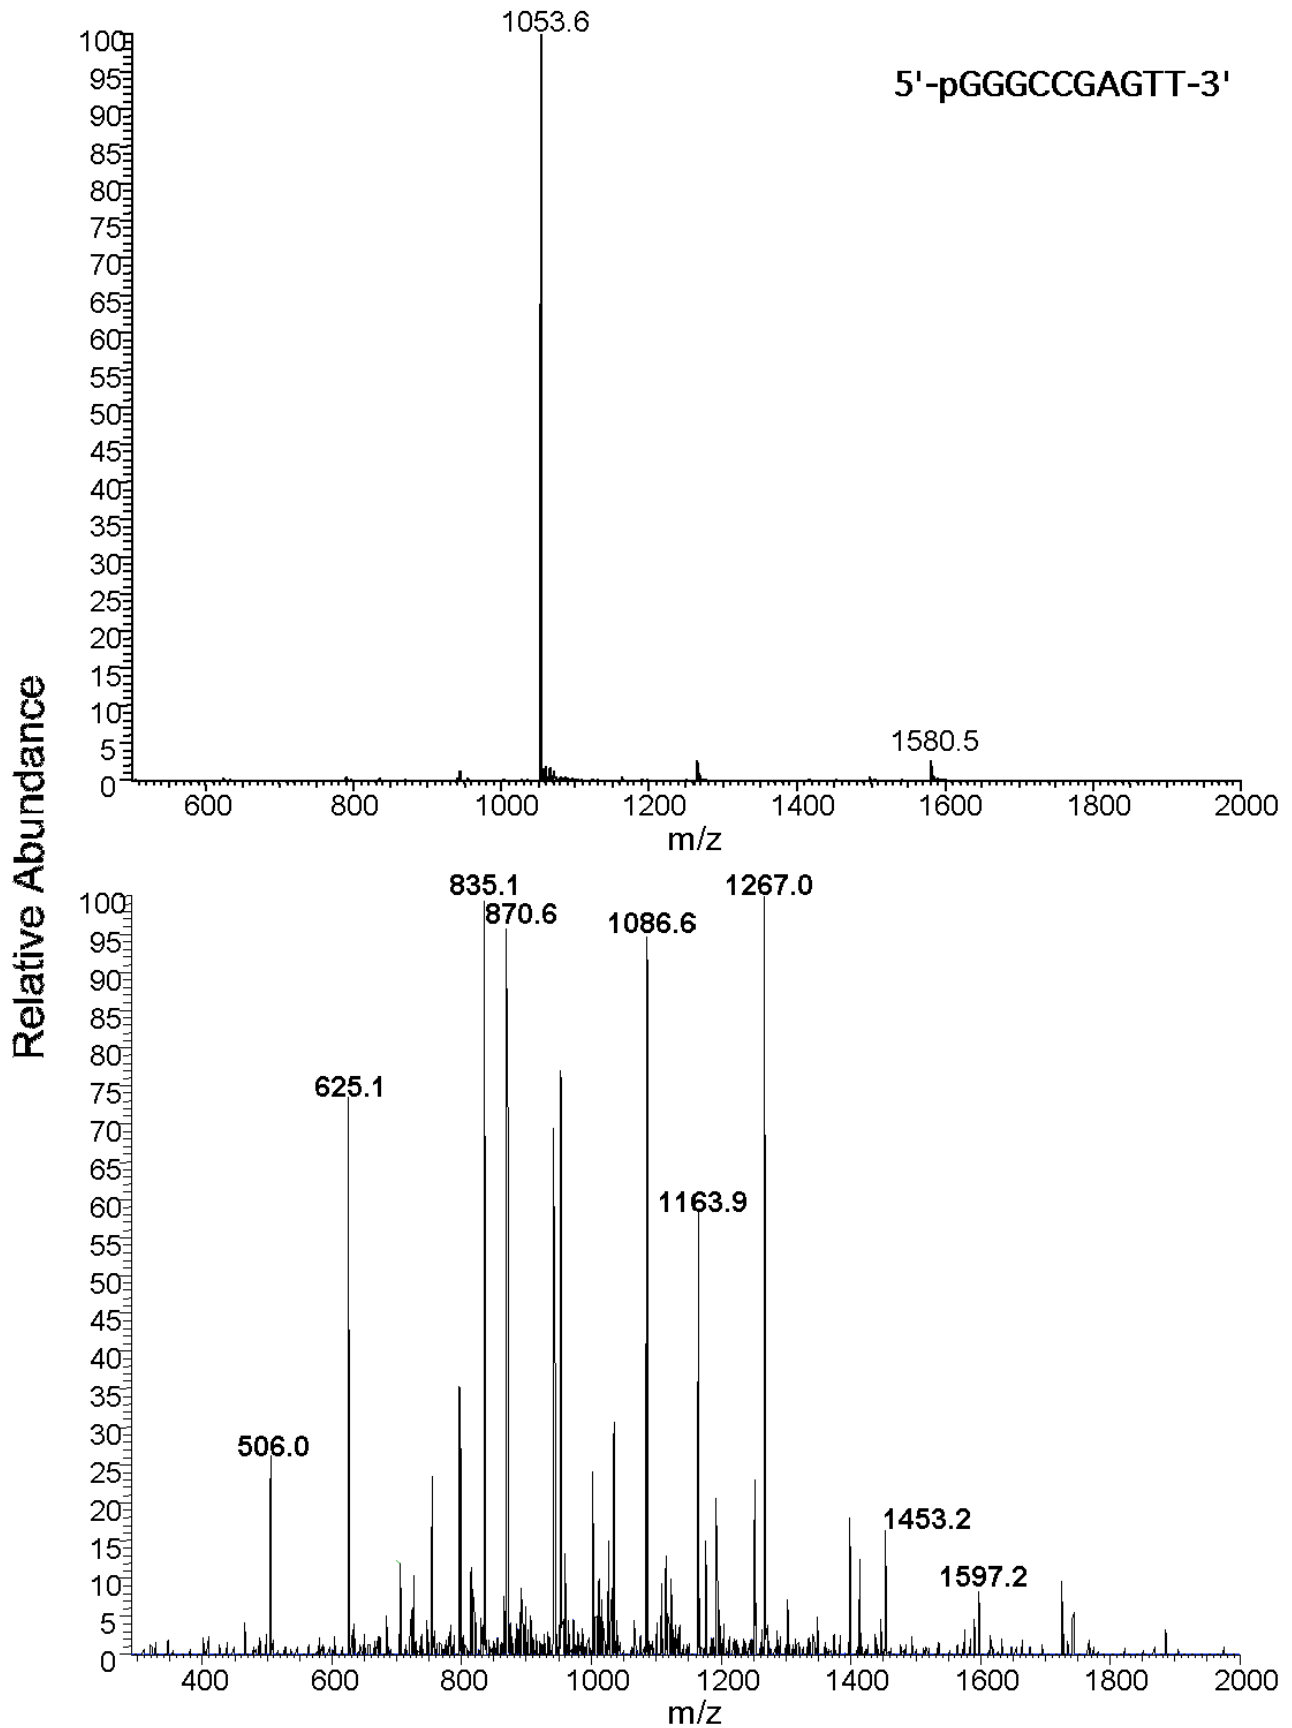

**Figure S17.** TIC (top) and CID (bottom) spectra of an authentic sample of 5'-pGGGCCGAGTT-3' ( $m/z$  1053.7)

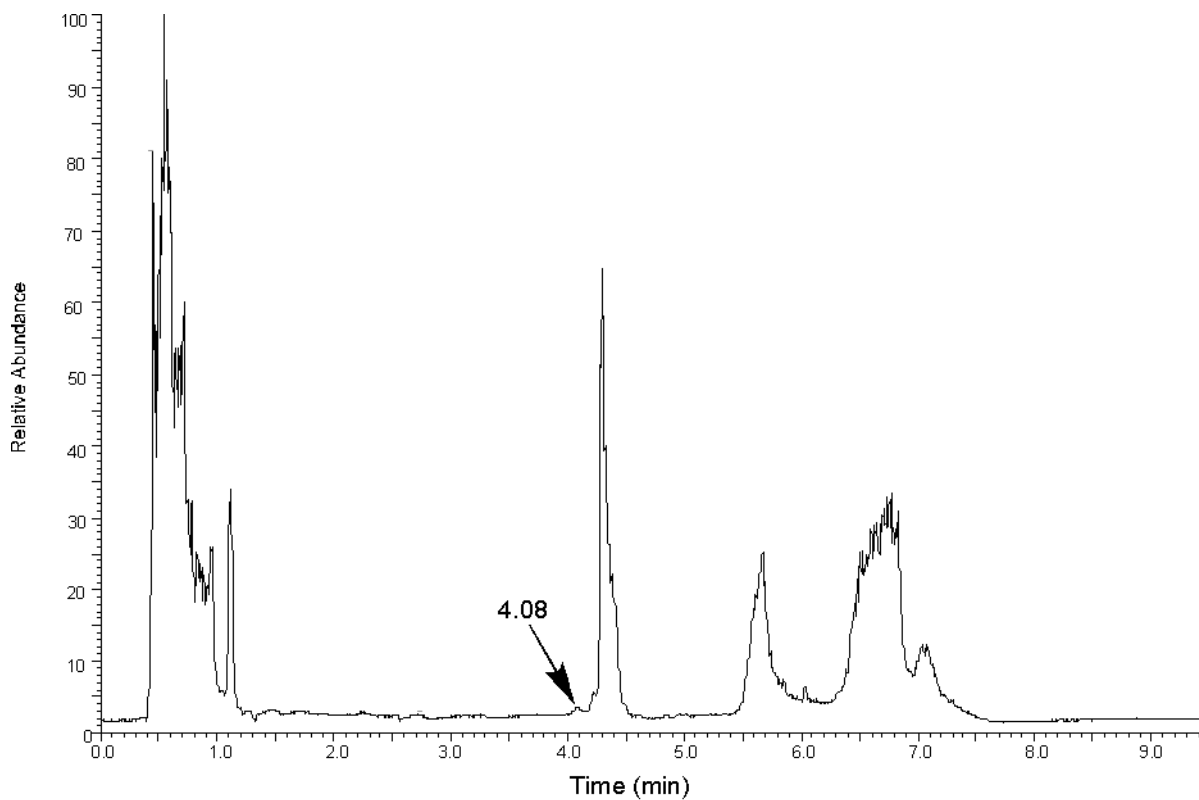

**Figure S18.** LC-ESI-MS/MS analysis of the pol II<sup>-</sup> extension of oligonucleotide **2b**

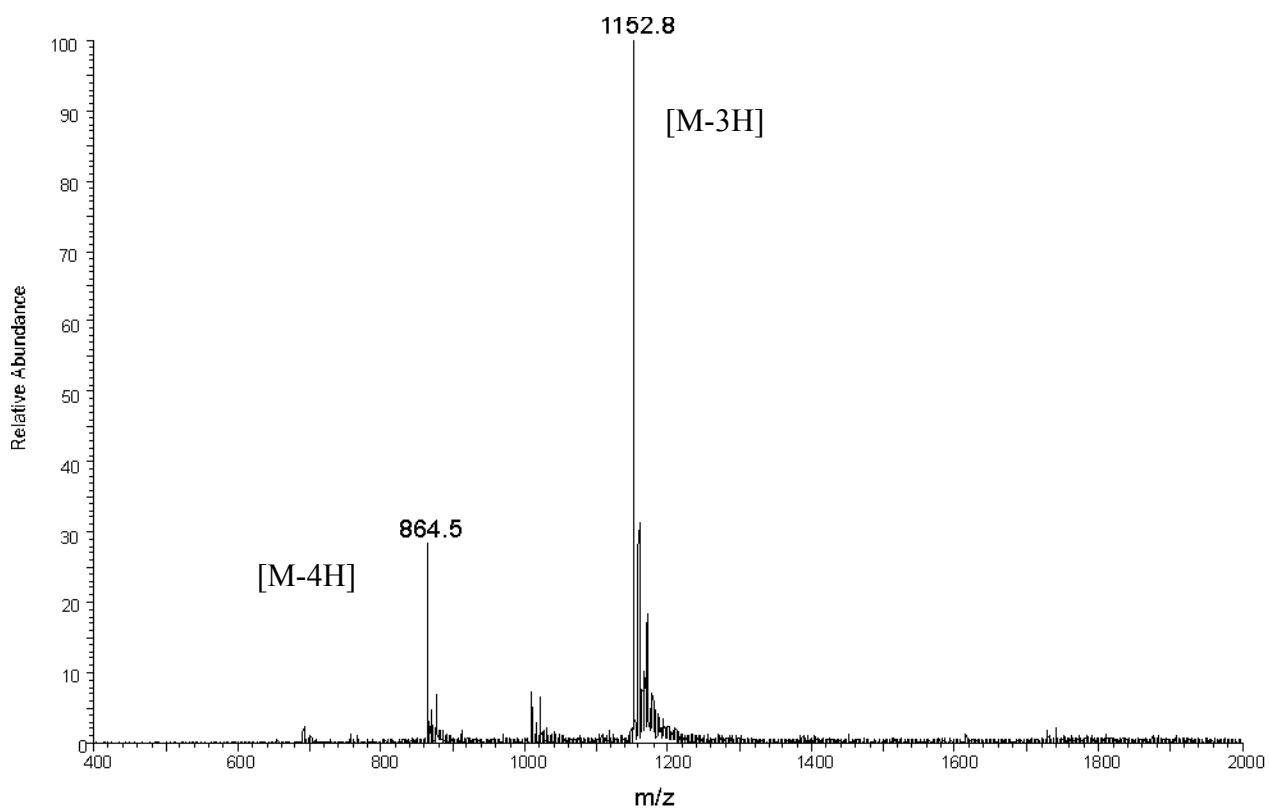

**Figure S19.** TIC spectrum of the pol II<sup>-</sup> extension products from oligonucleotide **2b**

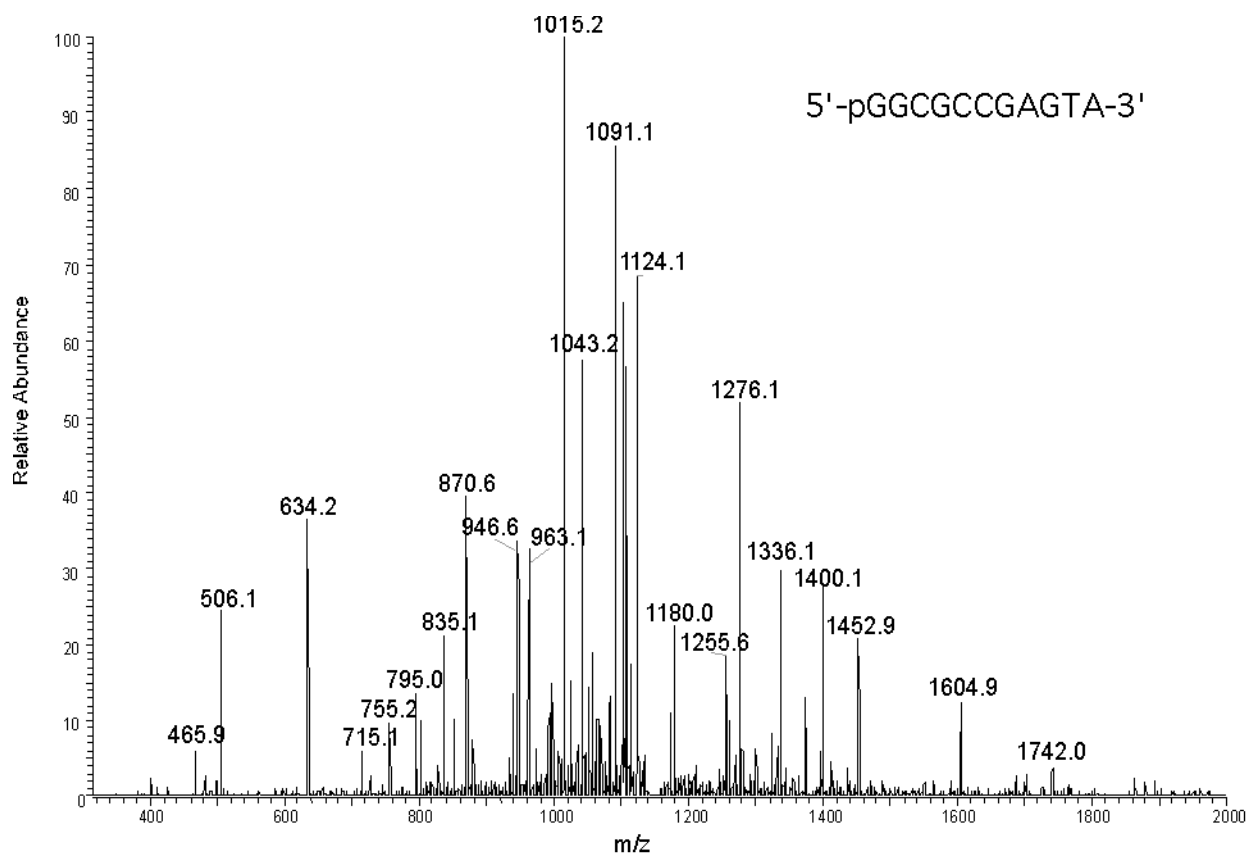

**Figure S20.** CID spectrum of the  $m/z$  1152.8 products from the pol II<sup>-</sup> extension of oligonucleotide **2b**.

**Table S3.** Observed and calculated CID fragmentation of 5'-pGGCGCCGAGTA-3' ( $m/z$  1015.8)

| Fragment assignment                 | observed | theoretical |
|-------------------------------------|----------|-------------|
| 5'-pG (a <sub>2</sub> -B)           | 506.1    | 506.05      |
| 5'-pGG (a <sub>3</sub> -B)          | 835.1    | 835.10      |
| 5'-pGGC (a <sub>4</sub> -B)         | 1124.1   | 1124.14     |
| 5'-pGGCG (a <sub>5</sub> -B)        | 1452.9   | 1453.20     |
| 5'-pGGCGC (a <sub>6</sub> -B)       | 1742.0   | 1742.2      |
| (a <sub>6</sub> -B, -2)             | 870.6    | 870.62      |
| 5-pGGCGCC (a <sub>7</sub> -B, -2)   | 1015.2   | 1015.14     |
| 5-pGGCGCCG (a <sub>8</sub> -B, -2)  | 1180.0   | 1179.67     |
| 5-pGGCGCCG (a <sub>9</sub> -B, -2)  | 1336.1   | 1336.20     |
| pCGCCGAGTA-3' (w <sub>9</sub> , -2) | 1400.1   | 1400.22     |
| pGCCGAGTA-3' (w <sub>8</sub> , -2)  | 1255.9   | 1255.70     |
| pCCGAGTA-3' (w <sub>7</sub> , -2)   | 1091.2   | 1091.18     |
| pCGAGTA-3' (w <sub>6</sub> , -2)    | 946.6    | 946.65      |
| pGAGTA-3' (w <sub>5</sub> )         | 1604.9   | 1605.27     |
| pAGTA-3' (w <sub>4</sub> )          | 1276.1   | 1276.21     |
| pGTA-3' (w <sub>3</sub> )           | 963.1    | 963.16      |
| p-TA-3' (w <sub>2</sub> )           | 634.2    | 634.11      |



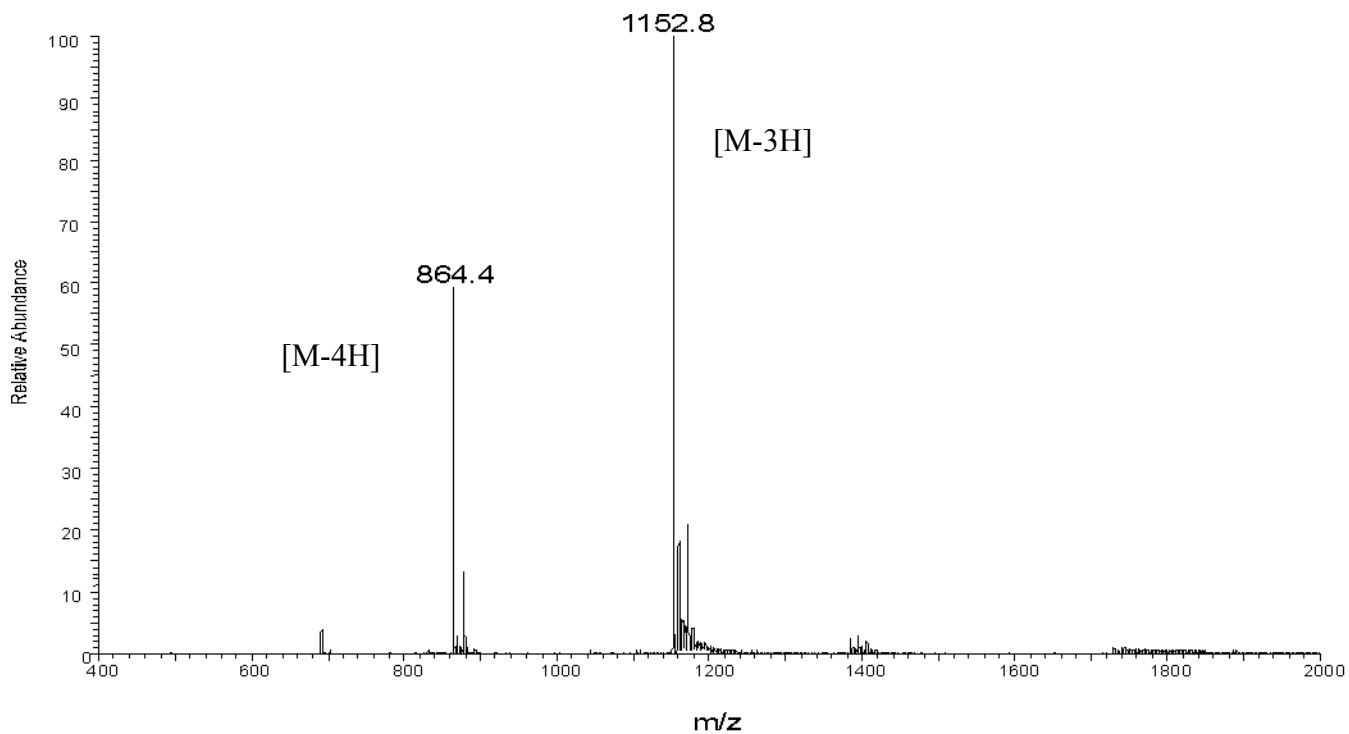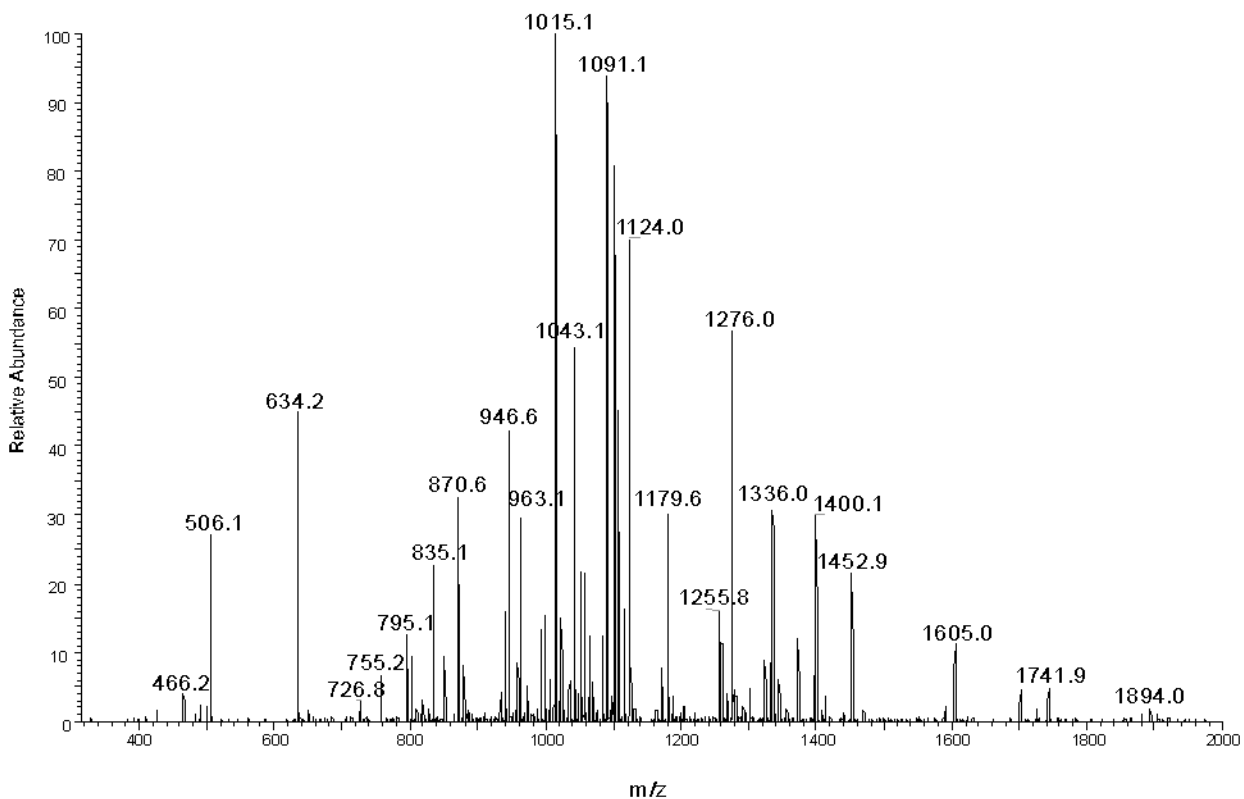

**Figure S21.** TIC (top) and CID (bottom) spectra of an authentic sample of 5'pGGCGCCGAGTA-3' ( $m/z$  1052)

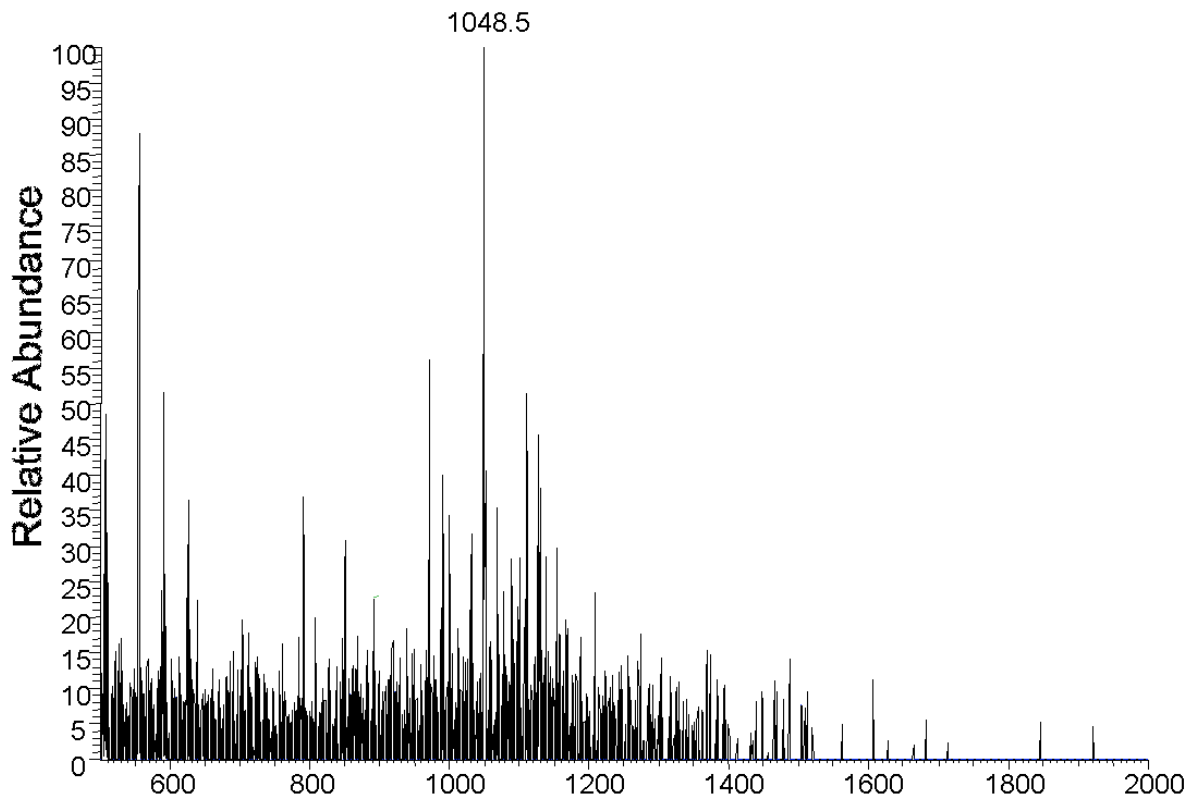

Figure S22. TIC spectrum of the pol II<sup>-</sup> extension of oligonucleotide **2c**

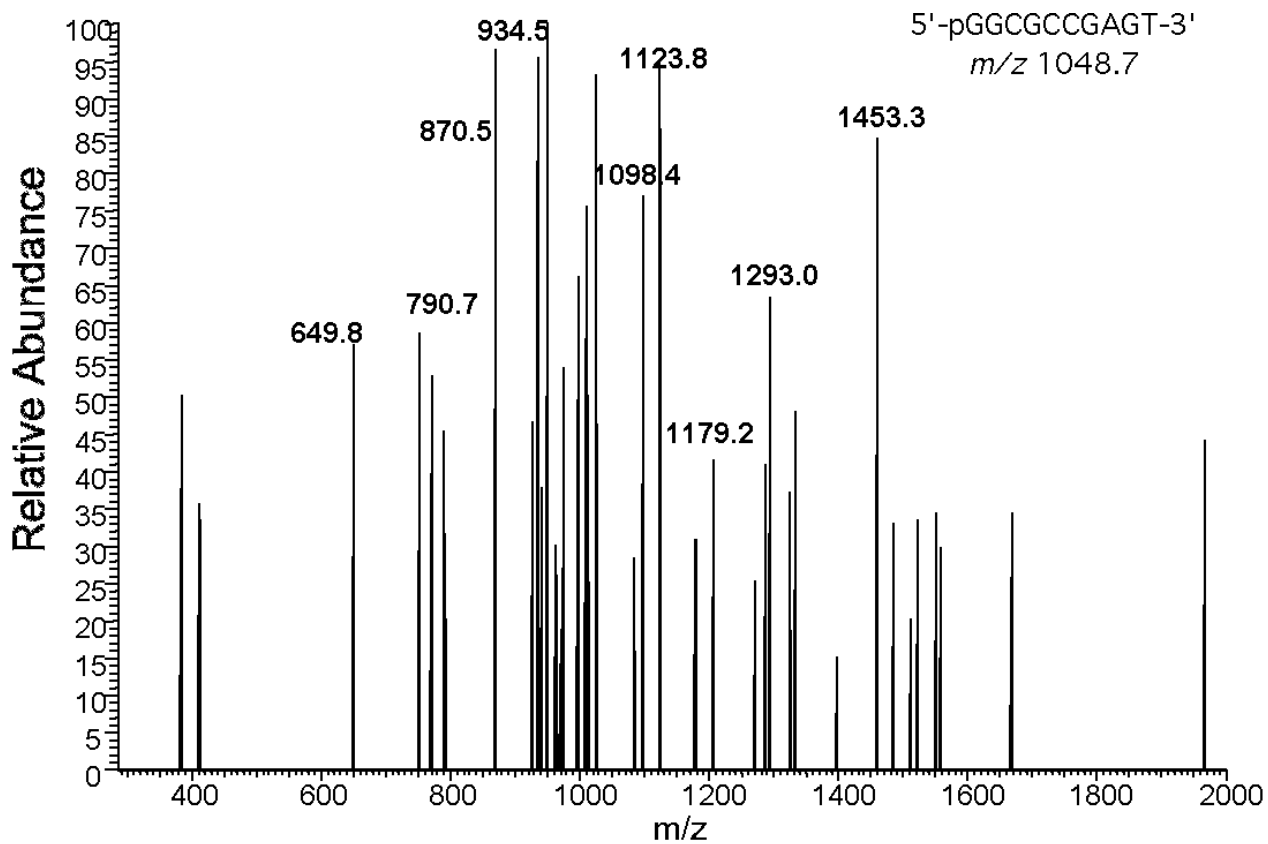

Figure S23. CID spectrum of the  $m/z$  1048.7 product from the pol II<sup>-</sup> extension of oligonucleotide **2c**.

**Table S4.** Observed and calculated CID fragmentation of 5'-pGGCGCCGAGT-3';  $m/z$  1048.7 (M-3H)

| Fragment assignment         | observed | theoretical |
|-----------------------------|----------|-------------|
| 5'-pGGC ( $a_4$ -B)         | 1124.0   | 1124.14     |
| 5'-pGGCG ( $a_5$ -B)        | 1453.0   | 1453.20     |
| 5'-pGGCGC ( $a_6$ -B, -2)   | 870.5    | 870.62      |
| 5'-pGGCGCCG ( $a_8$ -B, -2) | 1179.2   | 1179.67     |
| pGCCGAGT-3' ( $w_7$ , -2)   | 1098.4   | 1099.17     |
| pCCGAGT-3' ( $w_6$ , -2)    | 934.5    | 934.65      |
| pCGAGT-3' ( $w_5$ , -2)     | 790.7    | 790.12      |
| pGAGT-3' ( $w_4$ )          | 1293.0   | 1292.21     |
| pAGT-3' ( $w_3$ )           | 963.2    | 963.16      |
| pGT-3' ( $w_2$ )            | 649.8    | 650.10      |

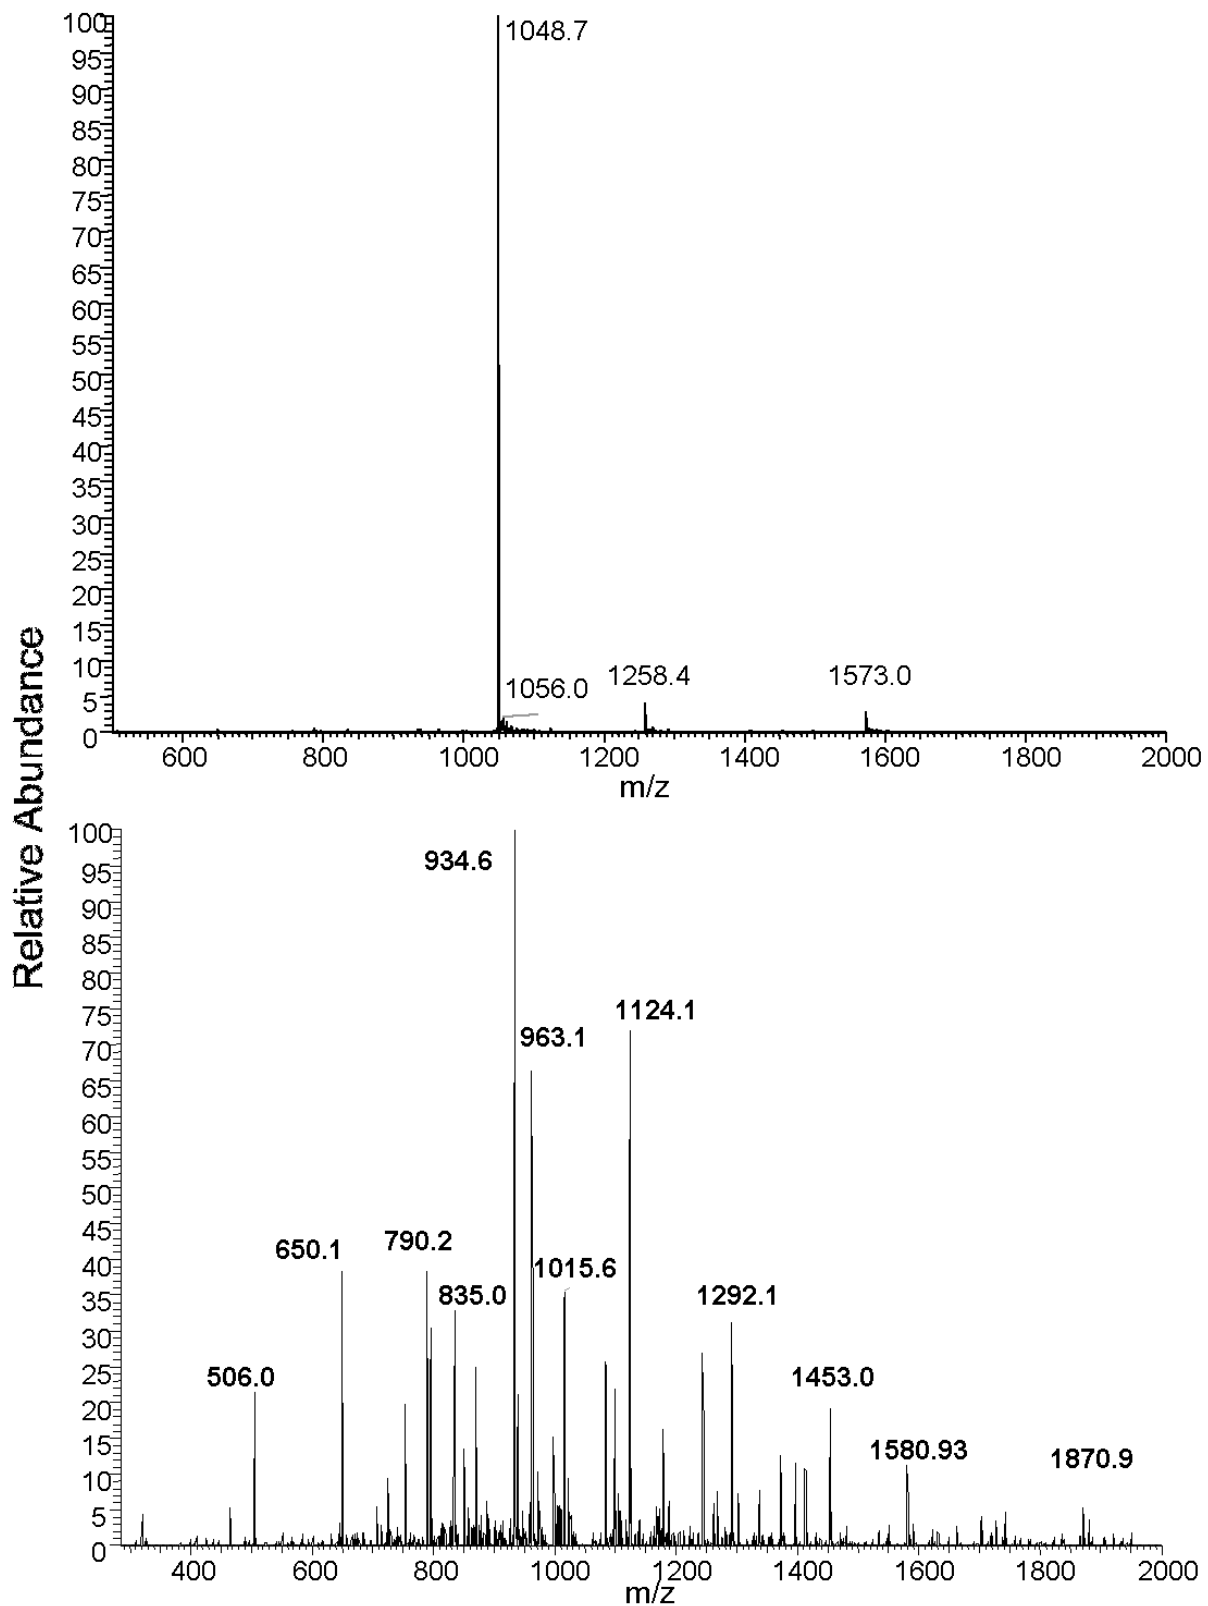

**Figure S24.** TIC (top) and CID (bottom) spectra of an authentic sample of 5'pGGCGCCGAGT-3' ( $m/z$  1048.7)

3'-CCC CCG AGC ATT CCT AAC CX~~C~~ GGC TCA-5' (1)  
 5'-<sup>32</sup>P-GGG GGC TCG TAA GGA TTG G

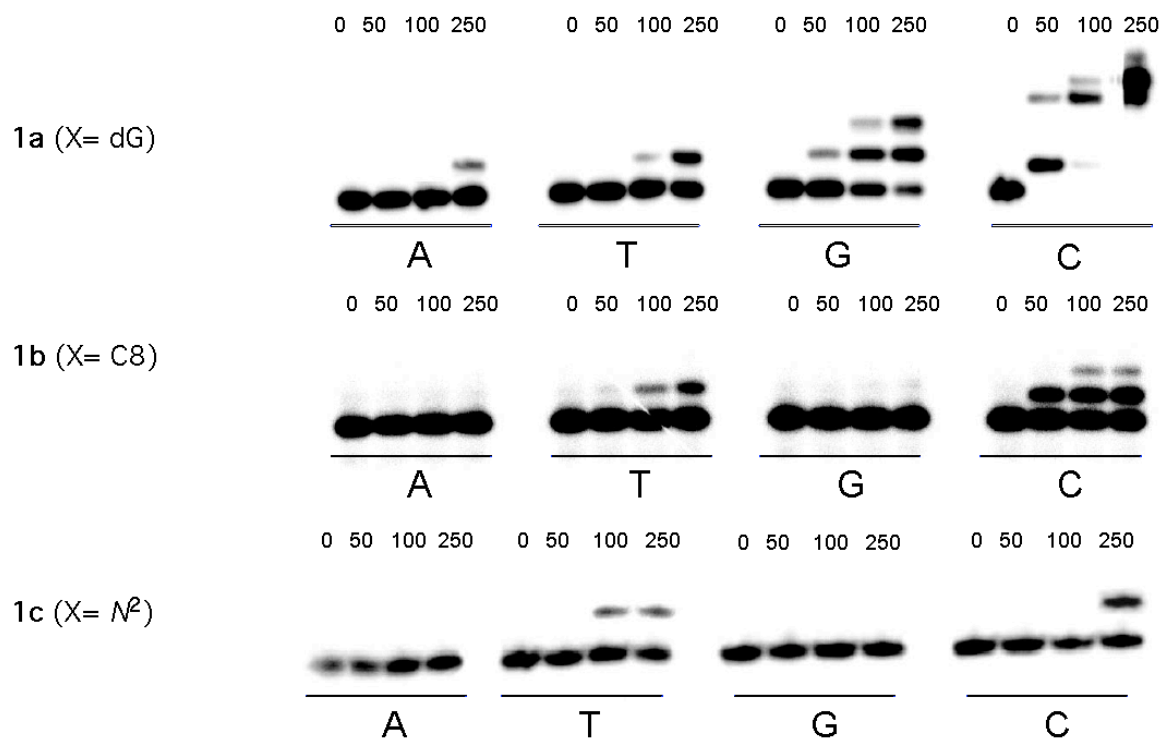

3'-CCC CCG AGC ATT CCT AAC CGC GX~~C~~ TCA-5' (2)  
 5'-<sup>32</sup>P-GGG GGC TCG TAA GGA TTG GCG C

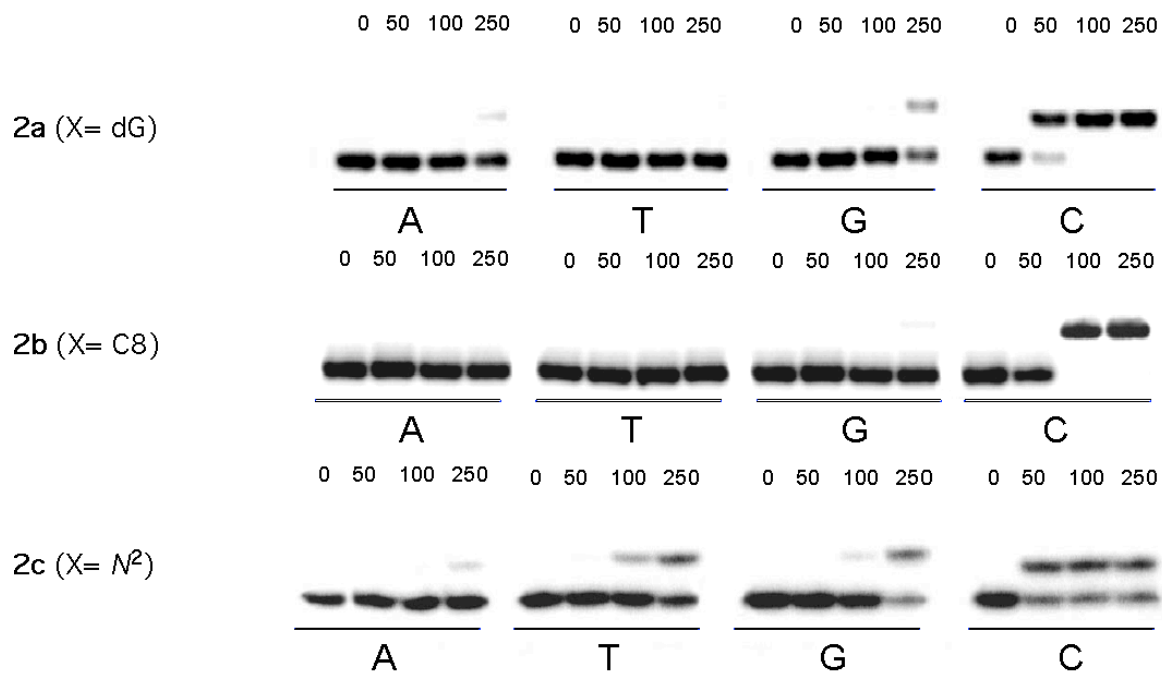

**Figure S25.** Single nucleotide incorporation of oligonucleotides **1a-c** and **2a-c** by Dpo4

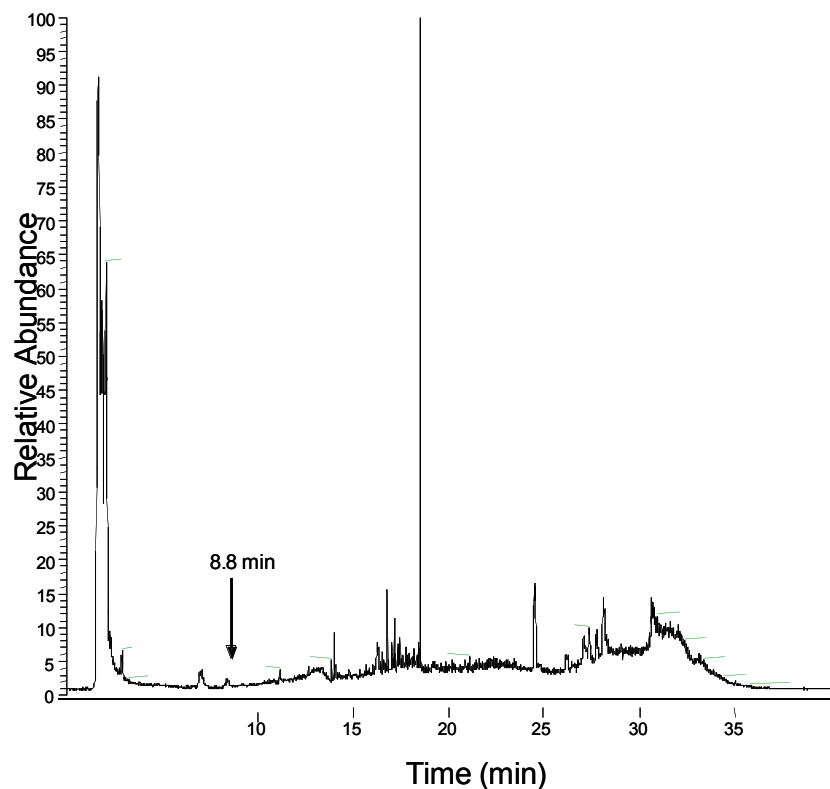

**Figure S26.** LC-ESI-MS/MS analysis of the Dpo4 extension of oligonucleotide **1b**.

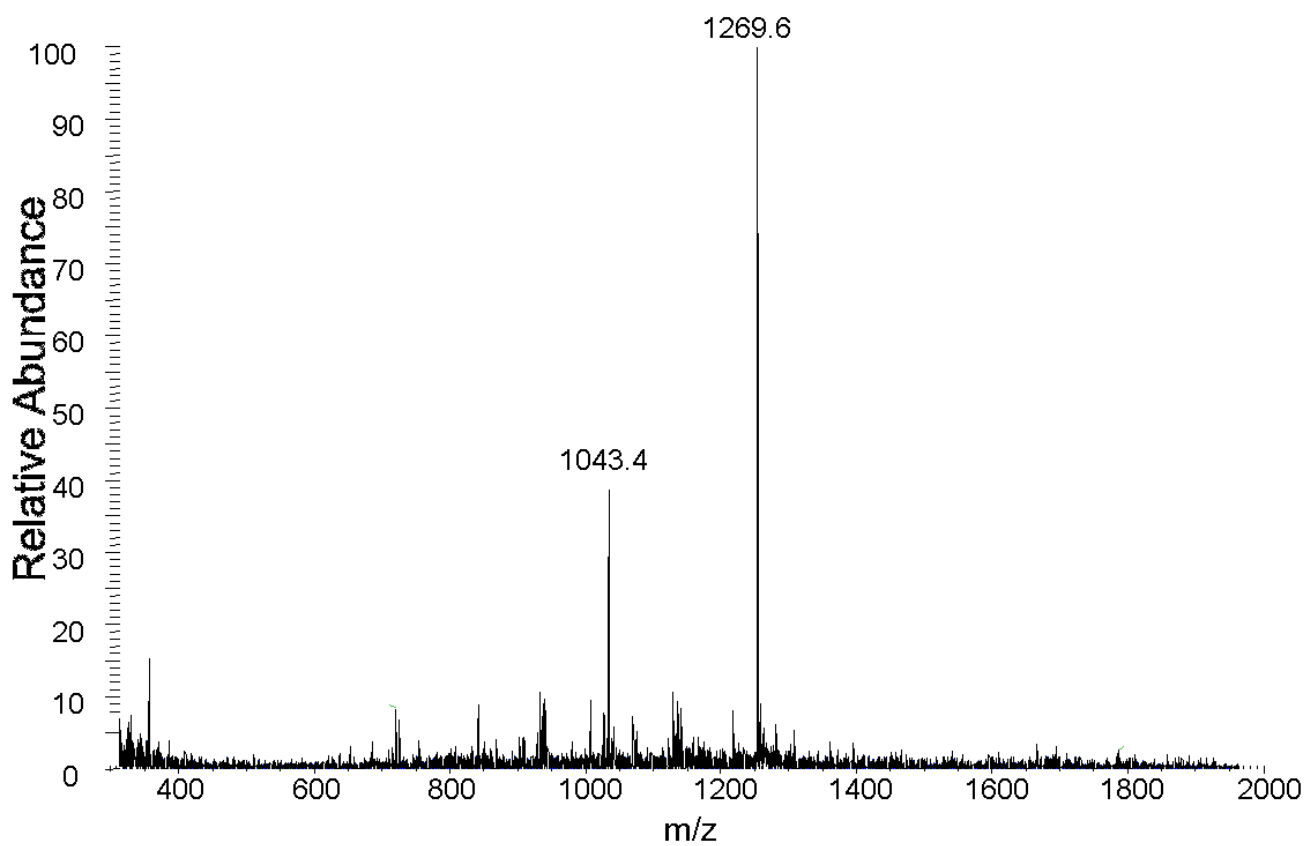

**Figure S27.** TIC spectrum of the Dpo4 extension products from oligonucleotide **1b**. The  $m/z$  1269.6 is from the 5'-end of the primer (5'-GGGGCTCGTAAGGATp-3')

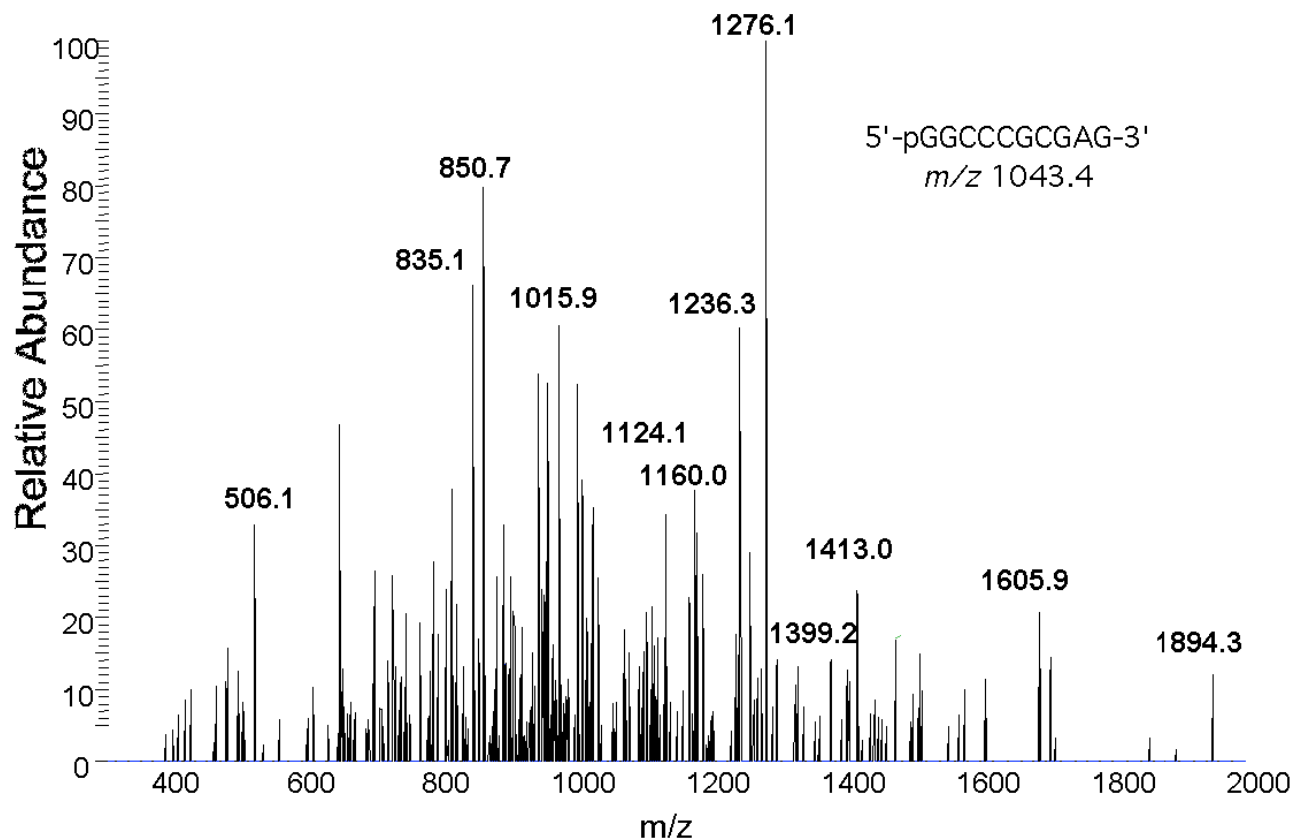

**Figure S28.** CID spectrum of the  $m/z$  1043.4 product from the Dpo4 extension of oligonucleotide **1b**.

**Table S5.** Observed and calculated CID fragmentation of 5'-pGGCCCGCGAG-3';  $m/z$  1043.4 (M-3H)

| Fragment assignment                 | observed | theoretical |
|-------------------------------------|----------|-------------|
| 5'-pG (a <sub>2</sub> -B)           | 506.1    | 506.05      |
| 5'-pGG (a <sub>3</sub> -B)          | 835.1    | 835.10      |
| 5'-pGGC (a <sub>4</sub> -B)         | 1124.1   | 1124.14     |
| 5'-pGGCC (a <sub>5</sub> -B)        | 1413.1   | 1413.19     |
| 5'-pGGCCC (a <sub>6</sub> -B, -2)   | 850.7    | 850.61      |
| 5'-pGGCCCG (a <sub>7</sub> -B, -2)  | 1015.9   | 1015.1      |
| 5'-pGGCCCGC (a <sub>8</sub> -B, -2) | 1160.0   | 1159.7      |
| pGCCCGCGAG-3' (w <sub>9</sub> , -2) | 1399.2   | 1400.72     |
| pCCCGCGAG-3' (w <sub>8</sub> , -2)  | 1236.3   | 1236.20     |
| pCGCGAG-3' (w <sub>6</sub> )        | 1985.3   | 1895.31     |
| pGCGAG-3' (w <sub>4</sub> )         | 1605.9   | 1606.26     |
| pCGAG-3' (w <sub>4</sub> )          | 1276.1   | 1277.21     |

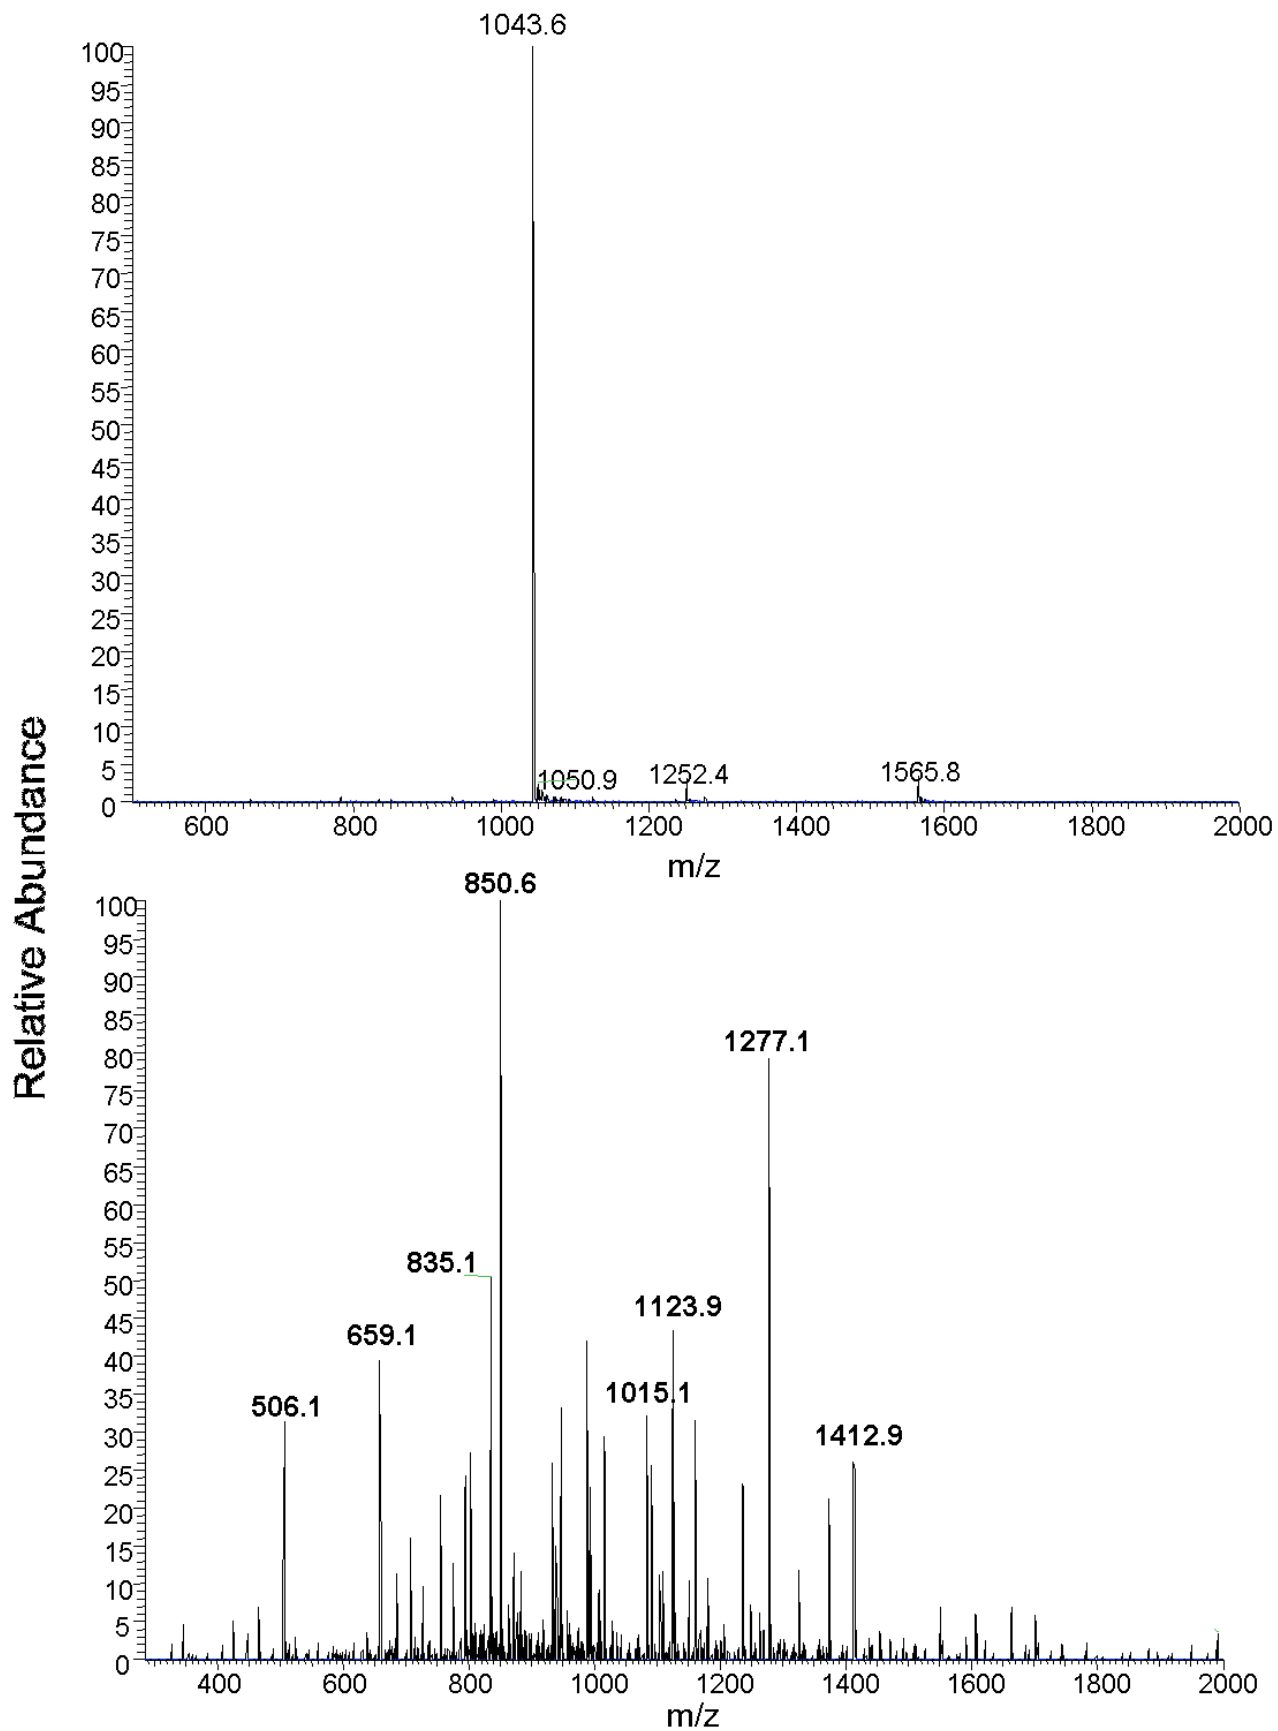

**Figure S29.** TIC (top) and CID (bottom) spectra of an authentic sample of 5'-pGGCCCGCGAG-3';  $m/z$  1043.4 (M-3H)



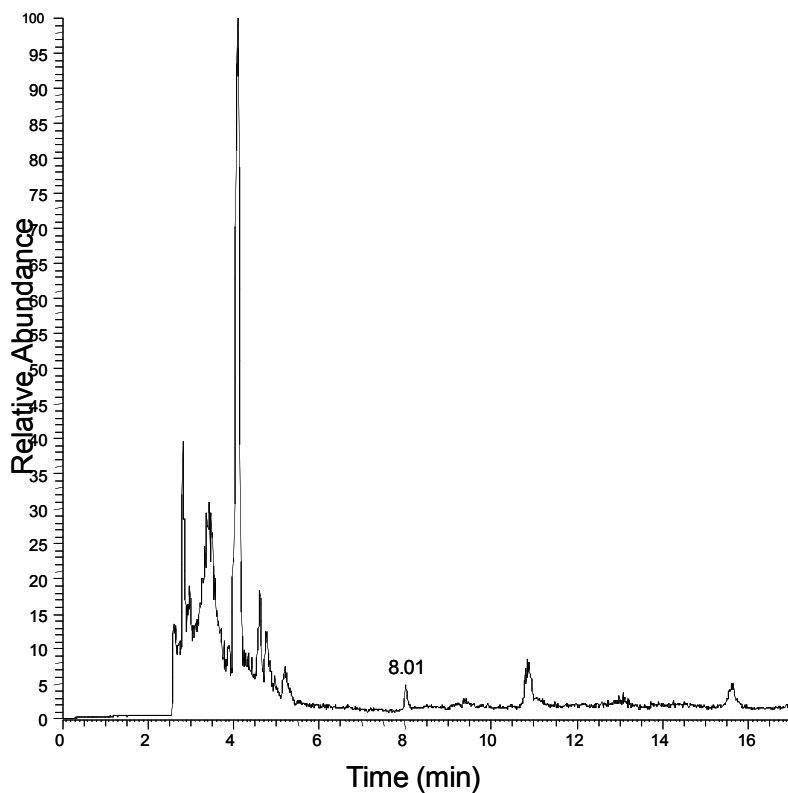

**Figure S30.** LC-ESI-MS/MS analysis of the Dpo4 extension of oligonucleotide **2b**

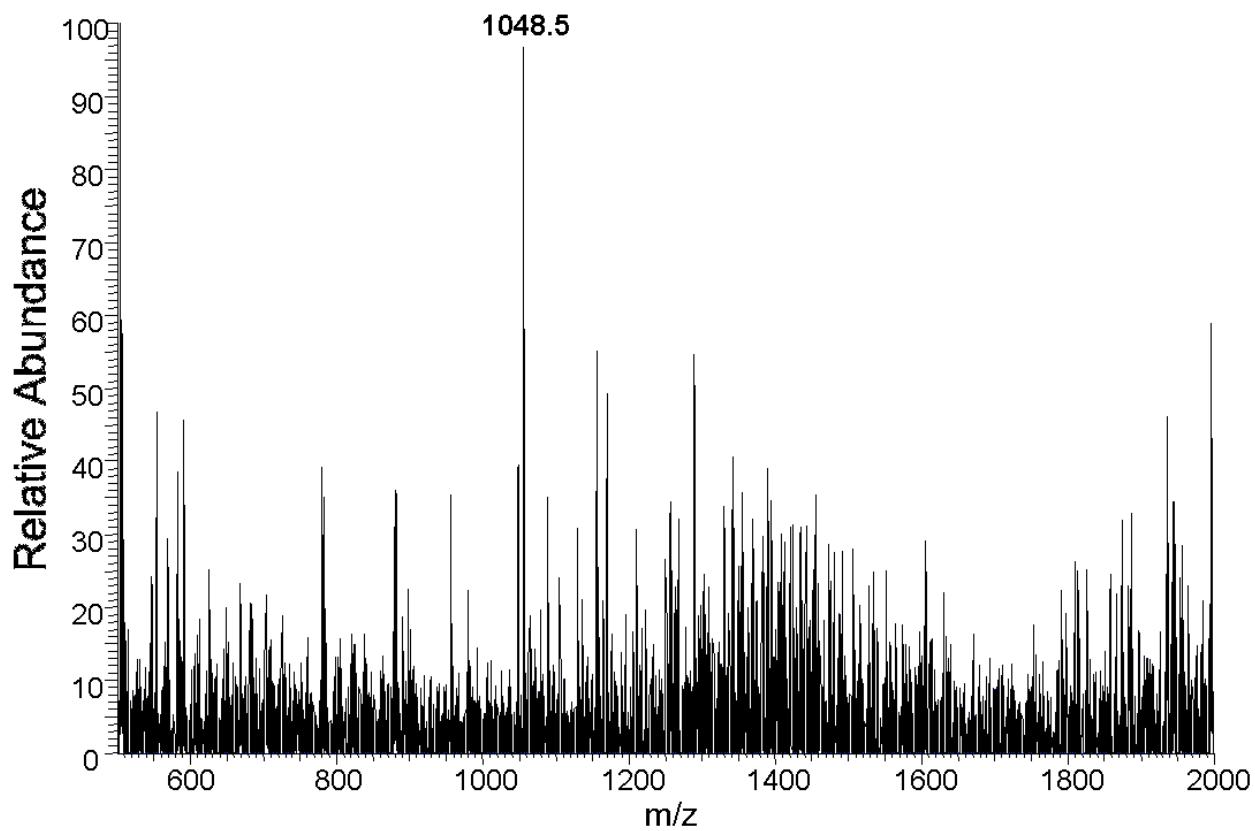

**Figure S31.** TIC spectrum of the Dpo4 extension products from oligonucleotide **2b**.

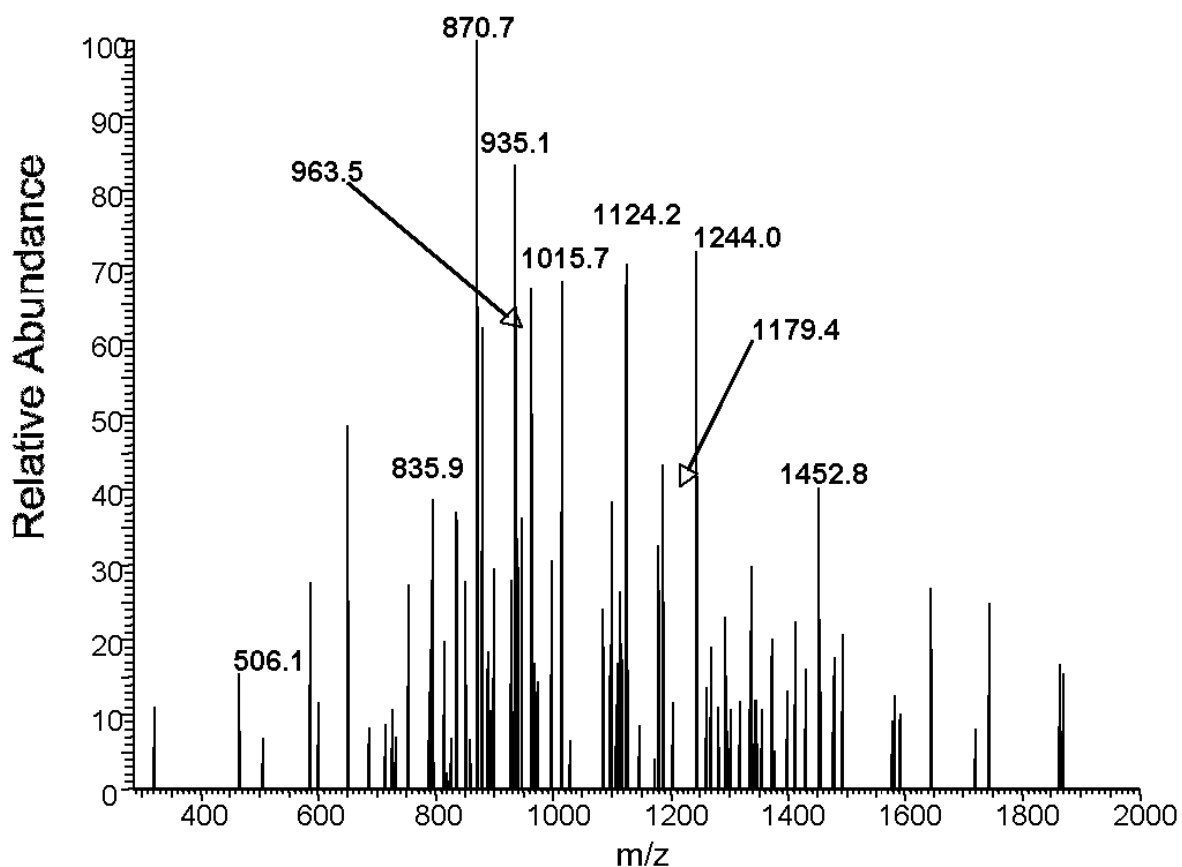

**Figure S32.** CID spectrum of the  $m/z$  1048.5 products from the Dpo4 extension of oligonucleotide **2b**.

**Table S6.** Observed and calculated CID fragmentation of 5'-pGGCGCCGAGT-3' ( $m/z$  1048.5)

| Fragment assignment                 | observed | theoretical |
|-------------------------------------|----------|-------------|
| 5'-pG (a <sub>2</sub> -B)           | 506.1    | 506.05      |
| 5-pGG (a <sub>3</sub> -B)           | 835.9    | 835.10      |
| 5'-pGGC (a <sub>4</sub> -B)         | 1124.2   | 1124.14     |
| 5'-pGGCG (a <sub>5</sub> -B)        | 1452.8   | 1453.20     |
| 5'-pGGCGC (a <sub>6</sub> -B, -2)   | 870.7    | 870.62      |
| 5'-pGGCGCC (a <sub>7</sub> -B, -2)  | 1015.7   | 1015.14     |
| 5'-pGGCGCCG (a <sub>8</sub> -B, -2) | 1179.4   | 1179.67     |
| pCGCCGAGT-3' (w <sub>8</sub> , -2)  | 1244.0   | 1243.70     |
| pCCGAGT-3' (w <sub>6</sub> , -2)    | 935.1    | 934.65      |
| pAGT-3' (w <sub>3</sub> )           | 963.5    | 963.16      |
| pGT-3' (w <sub>2</sub> )            | 650.1    | 650.10      |

RT: 0.00 - 17.00

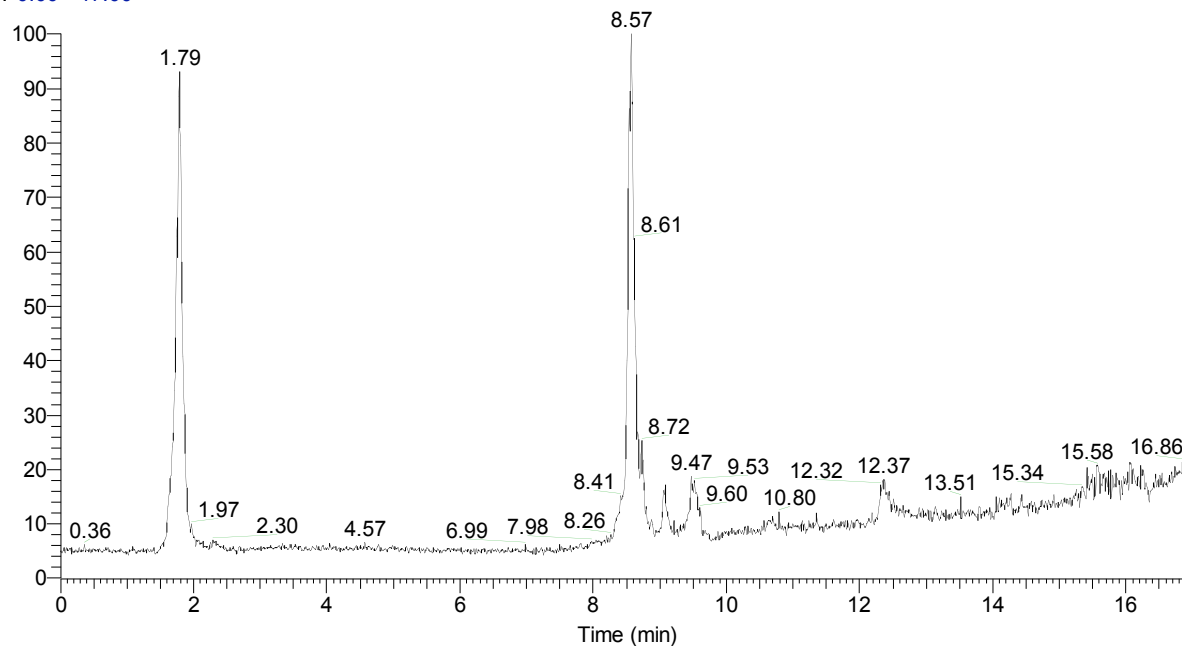

NL:  
1.72E8  
TIC F: MS  
Dpo4 N2 G1

Figure S33. LC-ESI-MS/MS analysis of the Dpo4 extension of oligonucleotide **1c**.

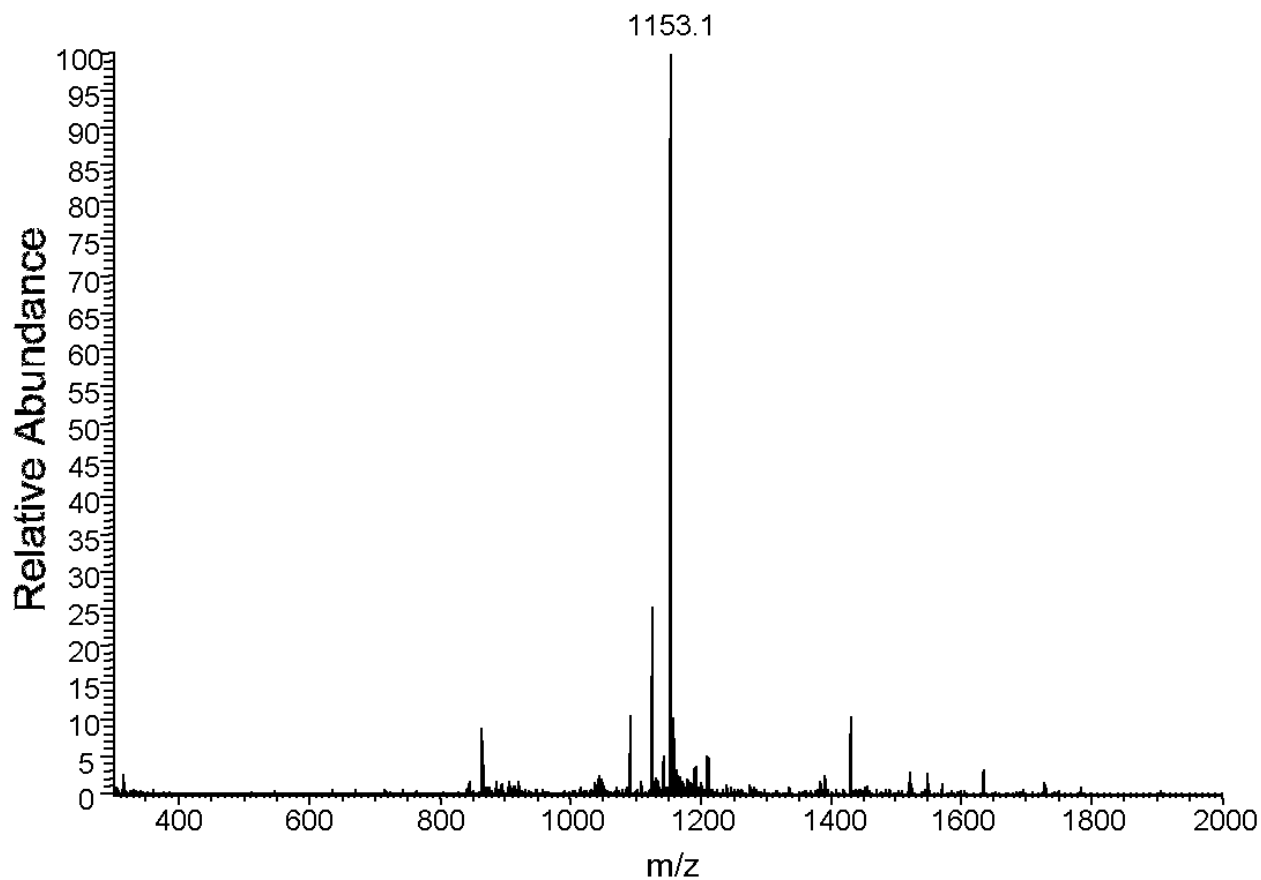

Figure S34. TIC spectrum of the Dpo4 extension products from oligonucleotide **1c**.

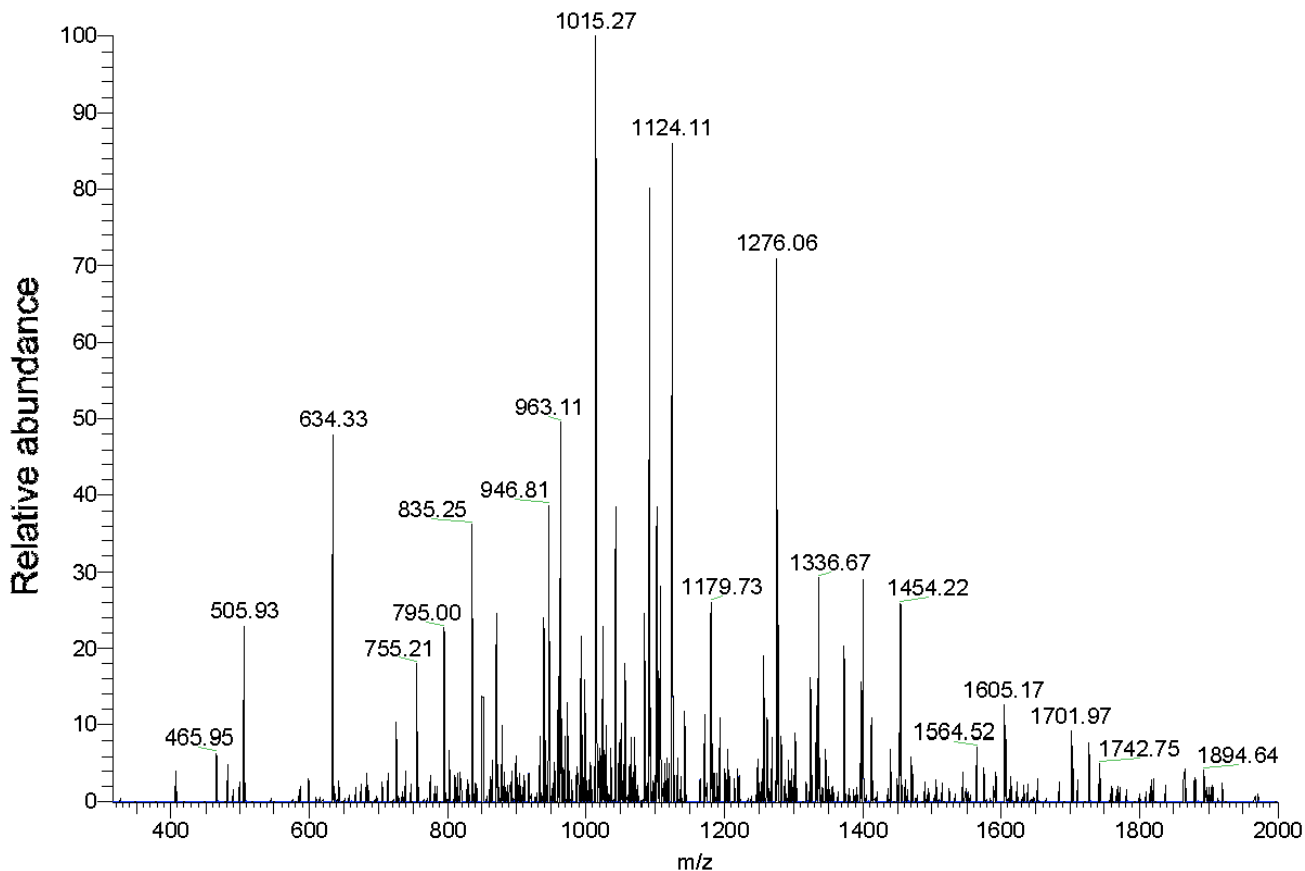

**Figure S35.** CID spectrum of the  $m/z$  1153.1 products from the Dpo4 extension of oligonucleotide **1c**.

**Table S7.** Observed and calculated CID fragmentation of 5'-pGGCGCCGAGTA-3' ( $m/z$  1153.1)

| Fragment assignment           | observed | theoretical |
|-------------------------------|----------|-------------|
| 5'-pG ( $a_2$ -B)             | 506.93   | 506.05      |
| 5'-pGG ( $a_3$ -B)            | 835.3    | 835.10      |
| 5'-pGGC ( $a_4$ -B)           | 1124.1   | 1124.14     |
| 5'-pGGCG ( $a_5$ -B)          | 1454.2   | 1453.20     |
| 5'-pGGCGC ( $a_6$ -B)         | 1742.7   | 1742.24     |
| ( $a_6$ -B, -2)               | 870.8    | 870.6       |
| 5'-pGGCGCC ( $a_7$ -B, -2)    | 1015.3   | 1015.14     |
| 5'-pGGCGCCG ( $a_8$ -B, -2)   | 1179.7   | 1179.67     |
| 5'-pGGCGCCGA ( $a_9$ -B, -2)  | 1336.7   | 1336.20     |
| pGGCGCCGAGTA-3' ( $w_8$ , -2) | 1400.7   | 1400.22     |
| pCGCCGAGTA-3' ( $w_8$ , -2)   | 1256.2   | 1255.70     |
| pGCCGAGTA-3' ( $w_7$ , -2)    | 1091.4   | 1091.18     |
| pCCGAGTA-3' ( $w_6$ , -2)     | 946.8    | 946.65      |
| pGAGTA-3' ( $w_5$ )           | 1605.7   | 1605.27     |
| pAGTA-3' ( $w_4$ )            | 1276.0   | 1276.21     |
| pGTA-3' ( $w_3$ )             | 963.1    | 963.16      |
| pTA-3' ( $w_2$ )              | 634.3    | 634.10      |

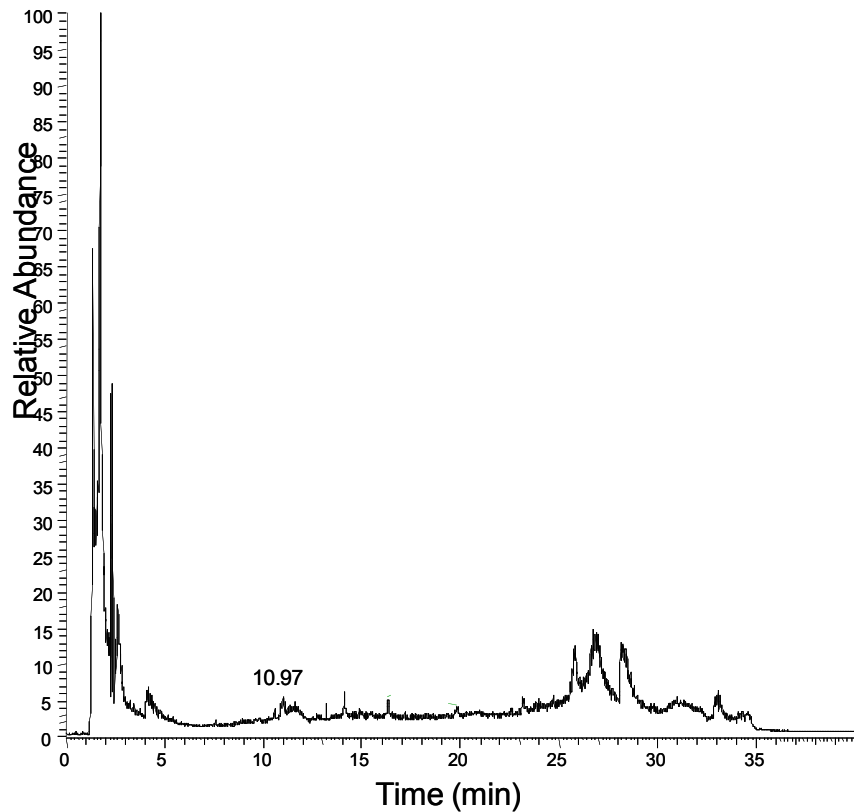

Figure S36. LC-ESI-MS/MS analysis of the Dpo4 extension of oligonucleotide **2c**.

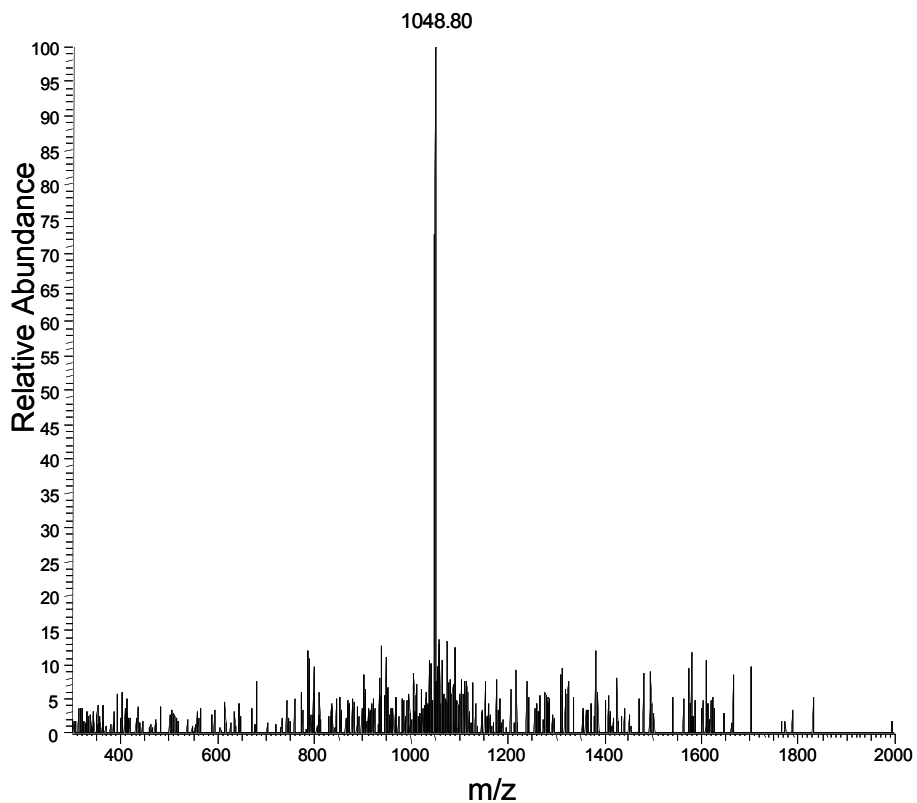

Figure S37. TIC spectrum of the Dpo4 extension products from oligonucleotide **2c**.

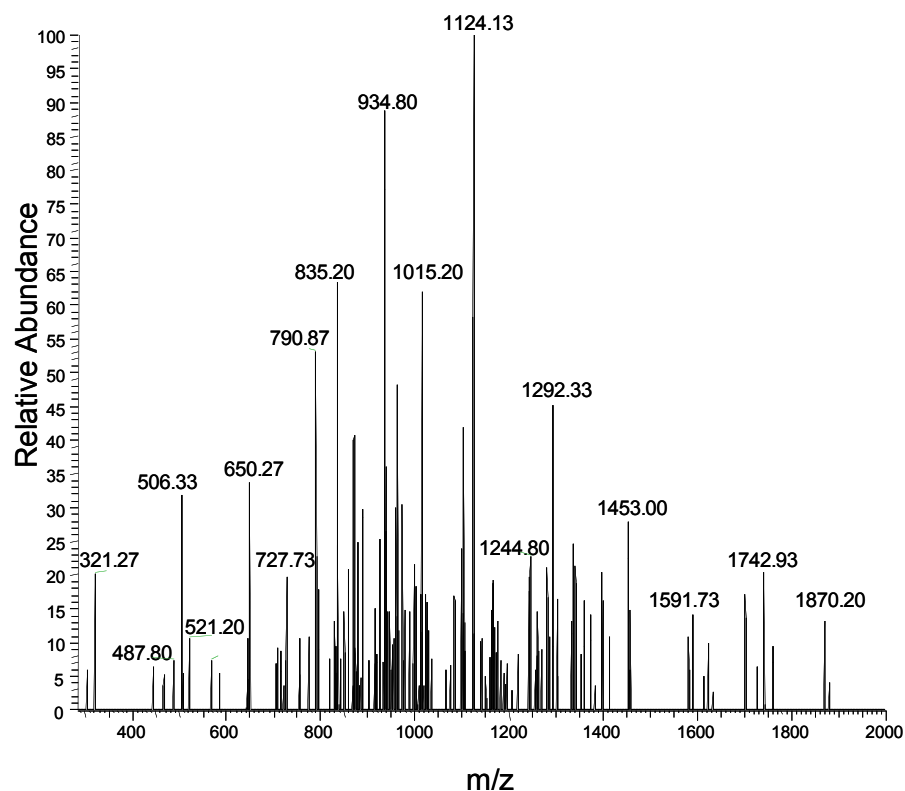

**Figure S38.** CID spectrum of the *m/z* xxx products from the Dpo4 extension of oligonucleotide **2b**.

**Table S8.** Observed and calculated CID fragmentation of 5'-pGGCGCCGAGT-3' (*m/z* 1048.8)

| Fragment assignment                | observed | theoretical |
|------------------------------------|----------|-------------|
| 5'-pG (a <sub>2</sub> -B)          | 506.3    | 506.05      |
| 5'-pGG (a <sub>3</sub> -B)         | 835.2    | 835.10      |
| 5'-pGGC (a <sub>4</sub> -B)        | 1124.1   | 1124.14     |
| 5'-pGGCG (a <sub>5</sub> -B)       | 1453.0   | 1453.20     |
| 5'-pGGCGC (a <sub>6</sub> -B)      | 1742.9   | 1742.24     |
| (a <sub>6</sub> -B, -2)            | 870.5    | 870.62      |
| 5'-pGGCGCC (a <sub>7</sub> -B, -2) | 1015.2   | 1015.14     |
| pCGCCGAGT-3' (w <sub>8</sub> , -2) | 1244.8   | 1243.7      |
| pGCCGAGT-3' (w <sub>7</sub> , -2)  | 1099.1   | 1099.17     |
| pCCGAGT-3' (w <sub>6</sub> )       | 1870.2   | 1870.30     |
| (w <sub>6</sub> , -2)              | 934.8    | 934.65      |
| pCGAGT-3' (w <sub>5</sub> , -2)    | 790.9    | 790.12      |
| pGAGT-3' (w <sub>4</sub> )         | 1292.3   | 1292.21     |
| pAGT-3' (w <sub>3</sub> )          | 963.4    | 963.16      |
| pGT-3' (w <sub>2</sub> )           | 650.2    | 650.10      |
| pT-3' (w <sub>1</sub> )            | 321.3    | 321.05      |
